# Supplementary material for: A single-ligand ultra-microporous MOF for precombustion CO2 capture and hydrogen purification
Source: PubMed Central journal article supplement — Sci Adv. 2015 Dec 18;1(11):e1500421. doi: 10.1126/sciadv.1500421 (PMC4730842; doi:10.1126/sciadv.1500421), 2015-12-18
Supplement: 1500421_SM.pdf [file 1500421_SM.pdf]

## Supplementary Materials for

### **A single-ligand ultra-microporous MOF for precombustion CO<sub>2</sub> capture and hydrogen purification**

Shyamapada Nandi, Phil De Luna, Thomas D. Daff, Jens Rother, Ming Liu, William Buchanan, Ayman I. Hawari, Tom K. Woo, Ramanathan Vaidhyanathan

Published 18 December 2015, *Sci. Adv.* **1**, e1500421 (2015)  
DOI: 10.1126/sciadv.1500421

#### **The PDF file includes:**

- Materials and Methods
- Single-crystal structure determination
- Analytical characterizations
- Adsorption analysis
- Pore size determination from PALS
- Virial
- Simulation results: HOA, selectivities, and working capacities
- Stability studies
- Adsorption-desorption cycling experiments
- Self-diffusion coefficient CO<sub>2</sub> in **1**
- Computational and molecular modeling details
- Comparison of CO<sub>2</sub>/H<sub>2</sub> selectivities of MOFs reported in the literature
- Fig. S1. Comparison of the nickel clusters present in **1**, with the recently reported nickel clusters in pyridine carboxylate-based MOFs.
- Fig. S2. Connolly surface representations of the nanoporous channels.
- Fig. S3. PXRD of **1**, simulated versus as synthesized (milligram and gram scale).
- Figs. S4 and S5. TGA of the as-made sample and the activated sample.
- Fig. S6. Infrared spectra of **1**.
- Fig. S7. CO<sub>2</sub> and N<sub>2</sub> adsorption isotherms of the milligram- and gram-scale syntheses.
- Fig. S8. Fitting comparison obtained for the nonlocal DFT fit to the 195-K CO<sub>2</sub> data.
- Fig. S9. Langmuir fits from the 195-K CO<sub>2</sub> data.
- Fig. S10. BET and Langmuir fits from the 77-K N<sub>2</sub> data.
- Fig. S11. Pore size distribution obtained from nonlocal DFT fit.

Fig. S12. PALS spectra of **1** at room temperature before and after the thermal annealing.

Fig. S13. HOA plots obtained from the virial fits and DFT analysis of the CO<sub>2</sub> isotherms.

Fig. S14. Comparison of experimental isotherms to the ones obtained from virial fits.

Fig. S15. Virial plots carried out using CO<sub>2</sub> isotherms at different temperatures.

Fig. S16. High-pressure H<sub>2</sub> isotherm at 298 K.

Fig. S17. Simulated HOA plots.

Fig. S18. CO<sub>2</sub>/H<sub>2</sub> selectivity from ideal adsorbed solution theory.

Fig. S19. Pure-component working capacity.

Fig. S20. Simulated mixed-component isotherm for H<sub>2</sub> purification and precombustion gas mixture.

Figs. S21 and S22. Mixed-component working capacities for a PSA (10 to 1 bar).

Figs. S23 and S24. Hydrolytic and thermal stability of **1** from PXRD.

Fig. S25. Hydrolytic stability evaluated from water vapor adsorption measurements.

Fig. S26. Hydrolytic stability from gas adsorption studies.

Fig. S27. Hydrolytic stability of **1** exposed to 80% RH at 80°C for 48 hours.

Fig. S28. Pressure-induced amorphization test from both PXRD and gas adsorption isotherms.

Fig. S29. Shelf life of **1** from gas adsorption isotherms.

Fig. S30. Comparison of the TGA cycling data for CO<sub>2</sub>-N<sub>2</sub> cycling done on **1** and ZnAtzO<sub>x</sub> at 35°C.

Fig. S31. Modeling of diffusion kinetics of CO<sub>2</sub> in **1** from experiment and simulation.

Fig. S32. Plot of the mean square displacement of CO<sub>2</sub> from a molecular dynamics simulation for which a computed diffusion coefficient was estimated.

Fig. S33. A graphical representation of the solvent-accessible volume of **1**.

Fig. S34. Snapshots from an MD simulation of CO<sub>2</sub> diffusing from the cage to the channels.

Fig. S35. Comparison of the probability densities of CO<sub>2</sub> derived from GCMC simulations at 195 K and 1 bar and 298 K and 40 bar.

Table S1. CO<sub>2</sub> uptakes at 195 and 273 K for selected ultra- and microporous MOFs.

Table S2. CO<sub>2</sub> adsorption and desorption data at 195 K.

Table S3. Fitting results of **1** from PALS analysis.

Table S4. Summary of the fitted virial parameters.

Table S5. Uptakes and selectivities for the binary CO<sub>2</sub>/H<sub>2</sub> (40:60) precombustion gas mixtures at a range of pressures.

Table S6. Uptakes and selectivities for the binary CO<sub>2</sub>/H<sub>2</sub> (20:80) H<sub>2</sub> purification mixture at a range of pressures.

Table S7. Working capacities and selectivities for a PSA (10 to 1 bar) at 313 K at the relevant H<sub>2</sub>/CO<sub>2</sub> gas mixtures for H<sub>2</sub> purification (80:20) and precombustion CO<sub>2</sub> capture (60:40) for integrated gasification combined cycle systems.

Table S8. Force field parameters used to model the H<sub>2</sub> guest molecules.

Table S9. Lennard-Jones parameters for framework atoms from the universal force field, CO<sub>2</sub> guest molecules.

Table S10. Cooperative CO<sub>2</sub>-CO<sub>2</sub> energies with respect to the number of molecules loaded.

Table S11. H<sub>2</sub>/CO<sub>2</sub> selectivities from literature.

## ***1. Materials and methods***

All the organic chemicals were purchased from sigma aldrich. The nickel salts were procured from Alfa Aesar. Compounds and solvents were all used without any further purification.

### ***Milligram scale synthesis of $Ni_9(\mu-H_2O)_4(H_2O)_2(C_6NH_4O_2)_{18}(H_2O)_{17}(CH_3OH)_4(C_4H_8O)_4$ (Ni-4PyC, 1):***

A solvothermal reaction between Nickel carbonate(0.119g; 1mmol) and Pyridine-4-carboxylic acid (0.244g; 2mmol) in a solution containing 1.5ml THF+2.5ml water +2ml MeOH was carried out at 150°C for 72hrs. A bright blue colored polycrystalline product was isolated by filtration and was washed with plenty of water and methanol. The air dried sample gave a yield of ~75% (based on Ni). The PXRD pattern indicated this to be a pure phase of **1**. We have also prepared 10-25gms of this sample with an easy scale-up procedure. CHN analysis (calculated values within brackets: C: 43.45 (43.2210); H: 3.62 (4.7039); N: 7.02 (7.0880)%). It was noted that the presence of THF was critical to the formation of this phase. However, it could be exchanged in a post synthetic manner for methanol. Also, the use of nickel nitrate and other salts of nickel could not result in a pure phase of **1**.

### ***10gm synthesis:***

About 2.975g of Nickel carbonate anhydrous was added to 6.1g of 4-PyC in a solution containing 25ml water + 20ml MeOH + 10ml THF, contents were stirred for 2 hours at room temperature. Contents were placed in a 123mL teflon lined Parr stainless steel autoclave and heated at 150°C for 72hrs. A bright blue colored polycrystalline product identical in appearance to the smaller scale preparation was obtained. The air dried sample gave a yield of ~90% (based on Ni). The PXRD, TGA and N<sub>2</sub> & CO<sub>2</sub> gas uptakes matched well with the small scale sample.

## ***2. Single crystal structure determination:***

Single-crystal data was collected on a Bruker SMART APEX four-circle diffractometer equipped with a CMOS photon 100 detector (Bruker Systems Inc.) and with a Cu K $\alpha$  radiation (1.5418 Å). The incident X-ray beam was focused and monochromated using Microfocus (I $\mu$ S). Crystal of **1** was mounted on nylon Cryo loops with Paratone-N oil. Data was collected at 173(2) K. Data was integrated using Bruker SAINT software and was corrected for absorption using SADABS. Structure was solved by Intrinsic Phasing module of the Direct methods and refined

using the SHELXTL 97 software suite. All non-hydrogen atoms were located from iterative examination of difference F-maps following which the structure was refined using least-squares method. Hydrogen atoms were placed geometrically and placed in a riding model. Some of the 4-PyC units in the structure of **1** were disordered over two sites and have been modeled satisfactorily using SIMU and DELU commands.

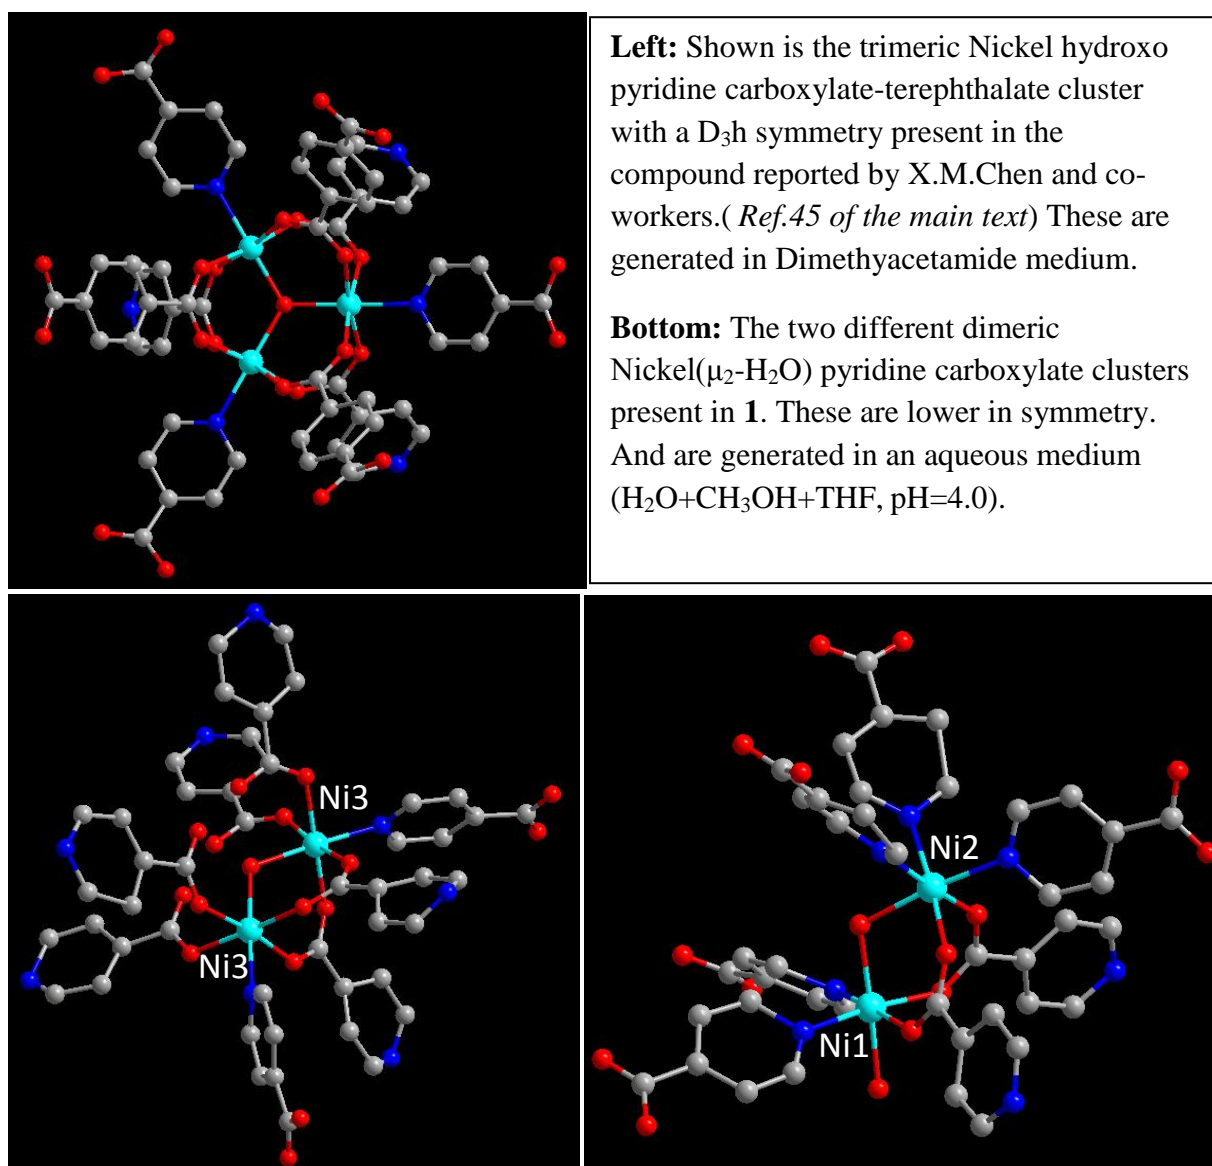

**Figure S1.** Comparison of the Nickel clusters present in **1**, with the recently reported nickel clusters in a pyridine carboxylate based MOF. Note that these hydroxo and water based clusters have much better stability toward hydrolysis in air as compared to the oxo-type clusters present in many widely studied MOFs synthesized in DMF or DMA medium. These molecular level features could play a critical role in the hydrolytic stability of the material. The dimers formed of Ni3 atoms connects to the other dimers (Ni1,Ni2) and also to the isolated nickel octahedra formed by Ni4, not shown here.

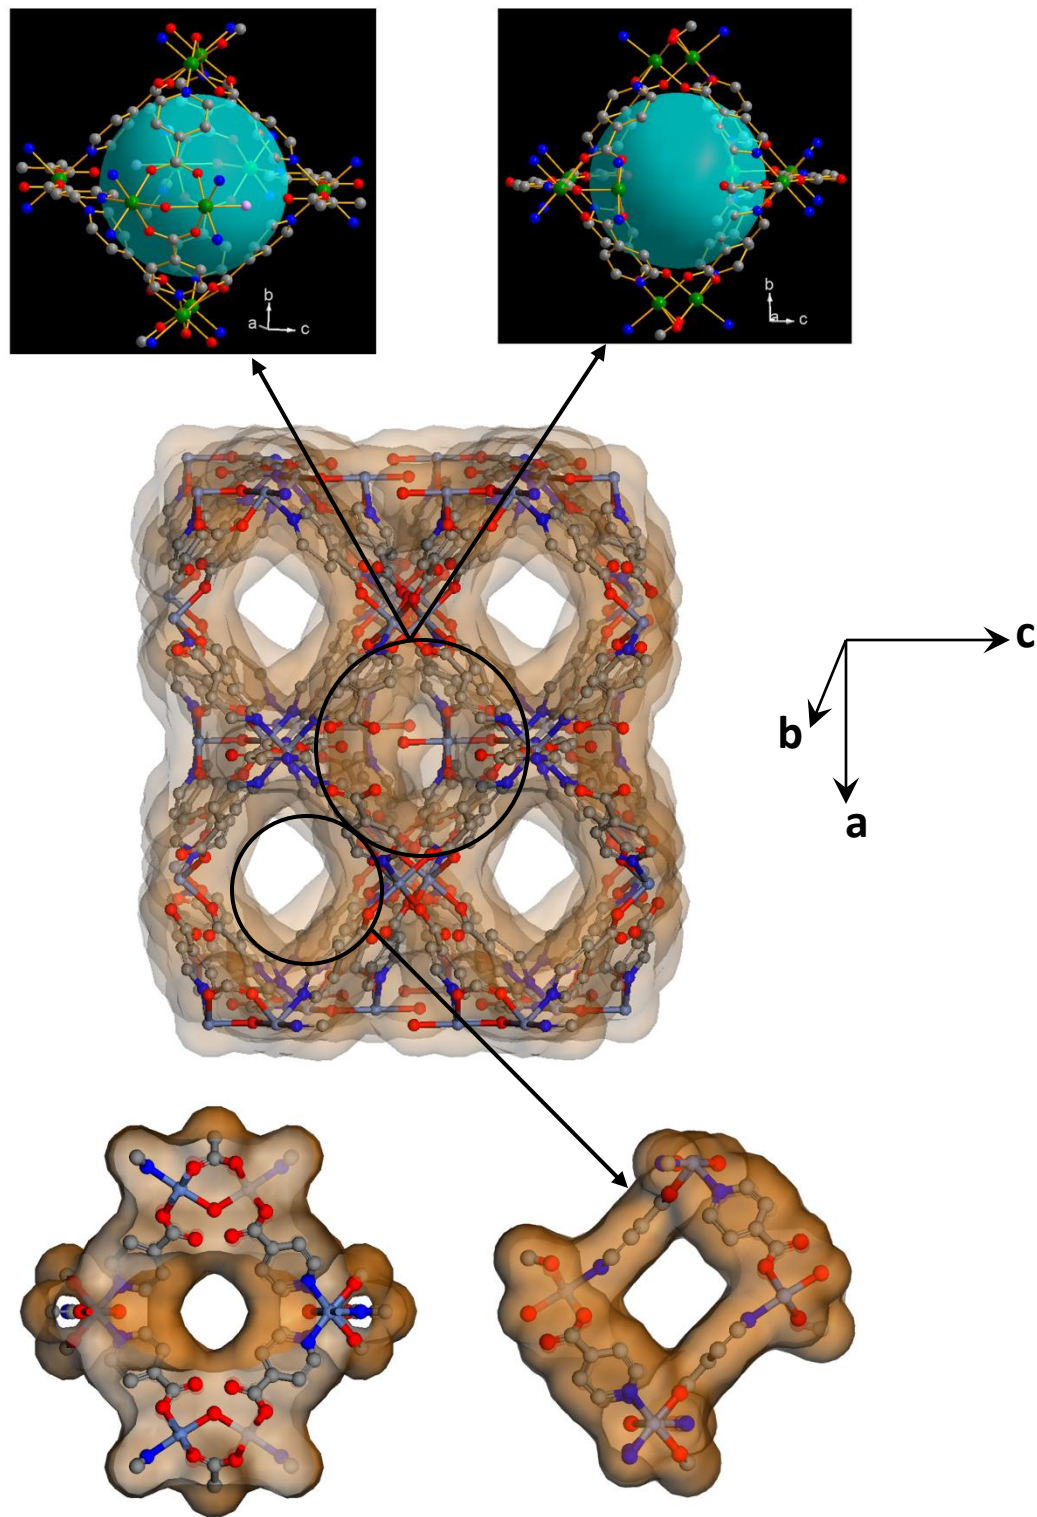

**Figure S2.** Top: The water lined cavities in **1**, these are not accessible even upon the removal of coordinated water (Top right) and do not contribute to overall porosity. Shown are the two accessible channels in **1**, the circular one is along the c-axis, while the square shaped one is along the b-axis. Notice that the former is polar.

**Table S1.** CO<sub>2</sub> uptakes at 195K and 273K for selected ultra- and microporous MOFs.

| MOF              | Pore dia.<br>(Å)                                                                                                                        | CO <sub>2</sub> uptake<br>(mmol/g) |             | HOA<br>(KJ/mol) | Reference                                                        |
|------------------|-----------------------------------------------------------------------------------------------------------------------------------------|------------------------------------|-------------|-----------------|------------------------------------------------------------------|
|                  |                                                                                                                                         | 195K                               | 273K        |                 |                                                                  |
| BioMOF-11        | 5.80(cavity)<br>&<br>5.20x5.20<br>(window) <sup>a</sup>                                                                                 | -----                              | 6.56        | 33.1            | <i>Chem. Sci.</i> <b>4</b> , 1746<br>(2013)                      |
| BioMOF-12        | 5.70(cavity)<br>&<br>5.20x5.00<br>(window) <sup>a</sup>                                                                                 | -----                              | 4.5         | 38.4            | <i>Chem. Sci.</i> <b>4</b> , 1746<br>(2013)                      |
| ZIF-78           | 7.10 <sup>e</sup>                                                                                                                       | -----                              | 3.34        | -----           | <i>J Am Chem Soc.</i><br><b>131</b> , 3875 (2009)                |
| ZIF-69           | 7.80 <sup>e</sup>                                                                                                                       | -----                              | 3.03        | -----           | <i>J Am Chem Soc.</i><br><b>131</b> , 3875 (2009)                |
| Cu-TDPAT         | cub-O <sub>h</sub><br>size-12 <sup>a</sup><br>T-T <sub>d</sub> size-<br>9.1 <sup>a</sup><br>T-O <sub>h</sub> size-<br>17.2 <sup>a</sup> | -----                              | 10.1        | 42.2            | <i>Angew. Chem. Int.</i><br><i>Ed.</i> <b>51</b> , 1412 (2012)   |
| SNU-M10          | 4.85 x<br>12.12 and<br>1.21x4.37 <sup>a</sup>                                                                                           | 5.4                                | 3.2         | -----           | <i>Angew. Chem. Int.</i><br><i>Ed.</i> <b>48</b> , 6865 (2009)   |
| SNU-M11          | 1.16 x<br>6.29 <sup>a</sup>                                                                                                             | 5.35                               | Very low    |                 | <i>Angew. Chem. Int.</i><br><i>Ed.</i> , <b>48</b> , 6865 (2009) |
| Cu-BTTri         | -----                                                                                                                                   | 19                                 | 3.9         | 22              | <i>J. Am. Chem. Soc.</i><br><b>131</b> , 8784 (2009)             |
| <b>Ni(4-PyC)</b> | <b>3.48, 4.80<sup>b</sup></b>                                                                                                           | <b>10.8</b>                        | <b>5.53</b> | <b>34</b>       | <b>Present work</b>                                              |
| Mg(DOBDC)        | 10.81 <sup>b</sup>                                                                                                                      | -----                              | 10.30       | 48              | <i>J. Am. Chem. Soc.</i><br><b>130</b> , 10870 (2008)            |
| IR MOF-11        | 9.03 <sup>b</sup>                                                                                                                       | -----                              | -----       | -----           | <i>Energy Environ.Sci.</i><br><b>3</b> ,268 (2010)               |
| IR MOF-12        | 13.02 <sup>b</sup>                                                                                                                      | -----                              | -----       | -----           | <i>Energy Environ.Sci.</i><br><b>3</b> , 268 (2010)              |
| IR MOF-13        | 10.00 <sup>b</sup>                                                                                                                      | -----                              | -----       | -----           | <i>Energy Environ.Sci.</i><br><b>3</b> , 268 (2010)              |
| IR MOF-14        | 13.80 <sup>b</sup>                                                                                                                      | -----                              | -----       | -----           | <i>Energy Environ.Sci.</i><br><b>3</b> , 268, (2010)             |
| PCN-61           | 12.00 <sup>b</sup>                                                                                                                      | -----                              | 5.71        | 21.4            | <i>J.Am.Chem.Soc.</i><br><b>133</b> ,748 (2011)                  |
| NJU_Bai7         | -----                                                                                                                                   | -----                              | 2.95        | 40.5            | <i>J. Am. Chem. Soc.</i><br><b>135</b> , 562 (2013)              |
| SYSU             | 6.3 × 6.3 <sup>a</sup>                                                                                                                  | -----                              | 4.5         | 28.2            | <i>J. Am. Chem. Soc.</i>                                         |

|                                                                                                                       |                                                             |       |            |             |                                                      |
|-----------------------------------------------------------------------------------------------------------------------|-------------------------------------------------------------|-------|------------|-------------|------------------------------------------------------|
|                                                                                                                       |                                                             |       |            |             | <b>135, 562 (2013)</b>                               |
| [Ni <sub>3</sub> (μ <sub>3</sub> OH)(ina) <sub>3</sub> (bdc) <sub>1.5</sub> ] <sub>2</sub> ·2.5DMA·CH <sub>3</sub> OH | 7.80 <sup>a</sup><br>7.40 <sup>a</sup><br>5.20 <sup>a</sup> | 9.35  | -----      | -----       | <i>Nature Comm.</i> <b>3</b> , 1 (2011)              |
| ZTF-1                                                                                                                 | 4.50 <sup>a</sup>                                           | ----- | 5.35       | <b>22.5</b> | <i>Chem. Commun.</i> <b>47</b> , 2011 (2011)         |
| ZnAtzOx                                                                                                               | 4.7 & 5.15 <sup>b</sup>                                     | 4.30  | 4.25       | 40          | <i>Science</i> , <b>650</b> , 330 (2010)             |
| ZnAtzPO <sub>4</sub>                                                                                                  | 5.6 & 7.8 <sup>b</sup>                                      | 4.85  | 3.2        | 32          | <i>Angew. Chem. Int. Ed.</i> <b>51</b> , 1826 (2012) |
| BioMOF-1                                                                                                              | 12.77x12.77 <sup>a</sup><br>9.97x9.97                       | ----- | 3.41       | 21.9        | <i>J. Am. Chem. Soc.</i> <b>132</b> , 5578 (2010)    |
| TMA@BioMOF-1                                                                                                          | „                                                           | ----- | 4.46       | 23.9        | <i>J. Am. Chem. Soc.</i> <b>132</b> , 5578 (2010)    |
| TEA@BioMOF-1                                                                                                          | „                                                           | ----- | 4.16       | 26.5        | <i>J. Am. Chem. Soc.</i> <b>132</b> , 5578 (2010)    |
| TBA@BioMOF-1                                                                                                          | „                                                           | ----- | 3.44       | 31.2        | <i>J. Am. Chem. Soc.</i> <b>132</b> , 5578 (2010)    |
| SIFSIX-3-Cu                                                                                                           | 3.50 <sup>e</sup>                                           | ----- | 2.54(298K) | 54          | <i>DOI: 10.1038/ncomms.5228 (2014)</i>               |
| SIFSIX-3-Zn                                                                                                           | 3.84 <sup>e</sup>                                           | ----- | 2.40(298K) | 45          | <i>DOI: 10.1038/ncomms.5228 (2014)</i>               |

<sup>a</sup>Experimentally determined.

<sup>b</sup>Calculated from Single crystal structure (do not factor in the Van Der waal radii).

----- = Data not available.



### ***3. Analytical characterizations***

#### ***Powder X-ray diffraction:***

Powder XRDs were carried out using a Rigaku Miniflex-600 instrument and processed using PDXL software.

#### ***Thermogravimetric Analysis:***

Thermogravimetry was carried out on NETSZCH TGA-DSC system. The routine TGAs were done under N<sub>2</sub> gas flow (20ml/min) (purge + protective) and samples were heated from RT to 550°C at 2K/min.

For the cycling experiments, no protective gas was used, and the gas flows were systematically switched between CO<sub>2</sub> and N<sub>2</sub> on the purge lines. The methanol exchanged sample of **1** was loaded on to the Pt pans and evacuated for 16hrs prior to the runs. TGA and DSC calibration and corrections runs were done just prior to carrying out the cycling experiments. This seemed to be critical to obtain accurate data from these cycling experiments. Without these systematic preparations, the data were found to be highly over estimated.

#### ***IR spectroscopy:***

IR spectra were obtained using a Nicolet ID5 attenuated total reflectance IR spectrometer operating at ambient temperature. The KBr pellets were used.

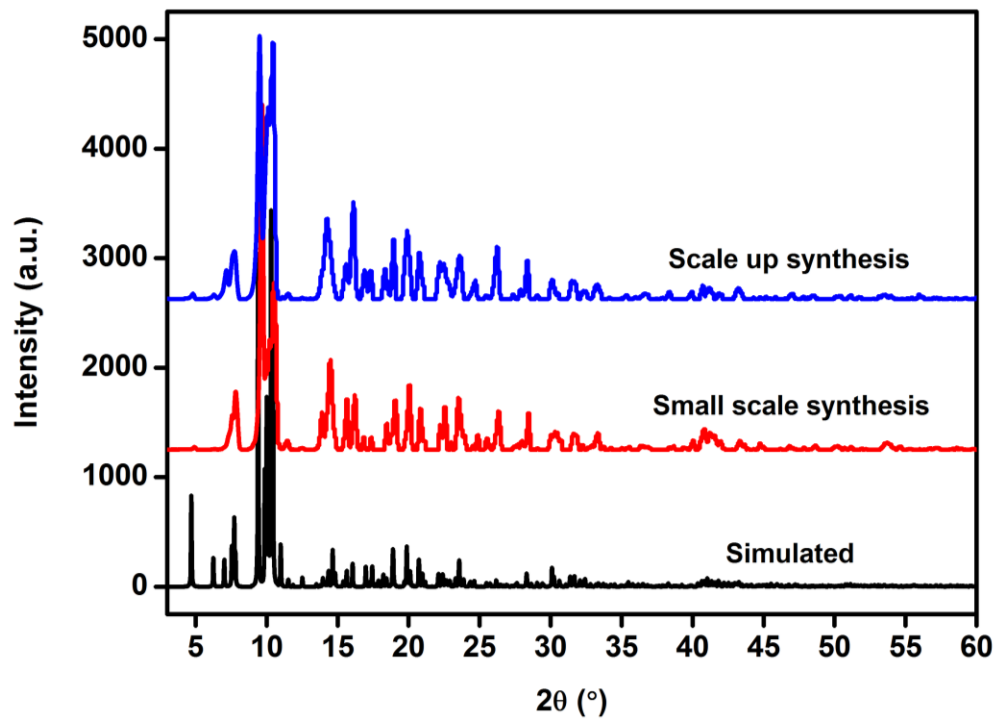

**Figure S3.** Comparison of the powder X-ray diffraction patterns of 1 with the ones simulated from single crystal data.

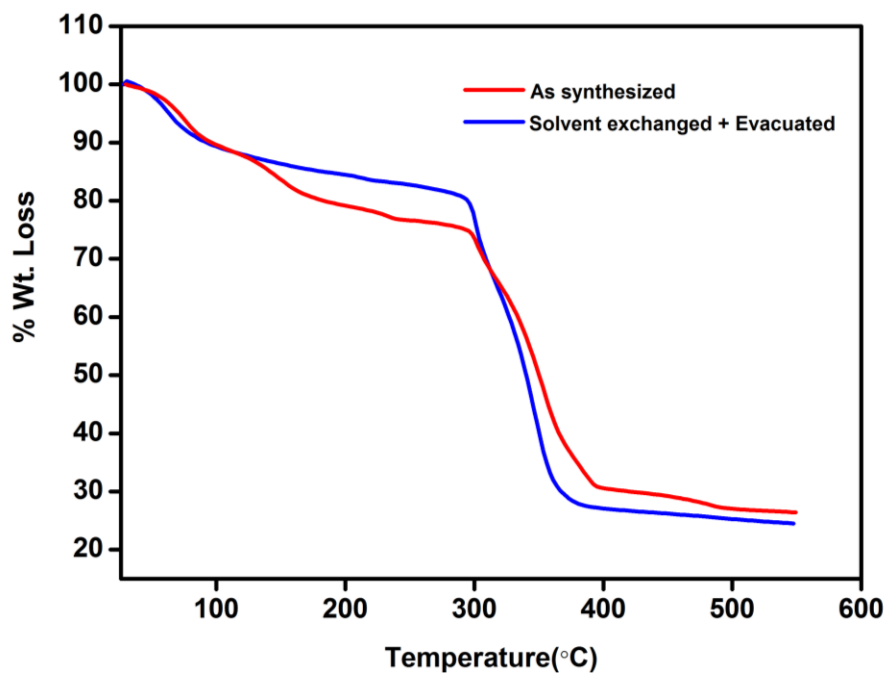

**Figure S4.** TGA plots of the as-made sample and the completely activated sample.

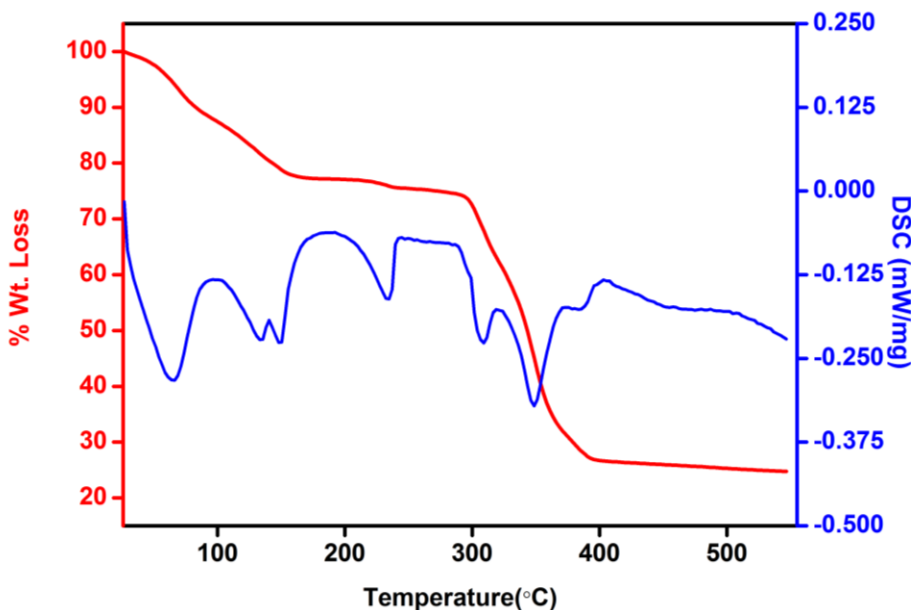

**Figure S5.** TGA carried out on the methanol exchanged sample of **1**. The weight loss have been calculated using the formula  $\text{Ni}_9(\mu\text{-H}_2\text{O})_4(\text{H}_2\text{O})_2(\text{C}_6\text{NH}_4\text{O}_2)_{18}(\text{H}_2\text{O})_{17}(\text{CH}_3\text{OH})_4(\text{C}_4\text{H}_8\text{O})_4$  (M. Wt. **3557.2**) . All the volatile solvent molecules are removed by 100°C (4 THF + 4 MeOH + 2 H<sub>2</sub>O(surface adsorbed) loss, calc:12.71%, obsd: 12.7), while most of the free solvent water and the coordinated water come off at 180°C (calc: 9.61%; obsd: 10.21). Some of the water molecules (2.02%) do not leave the structure even at 200°C. It is highly likely that this is some of the bridging water molecules (calc: 2.05%) that are crucial for holding the framework together. The loss of this 2% water triggers the collapse of the structure.

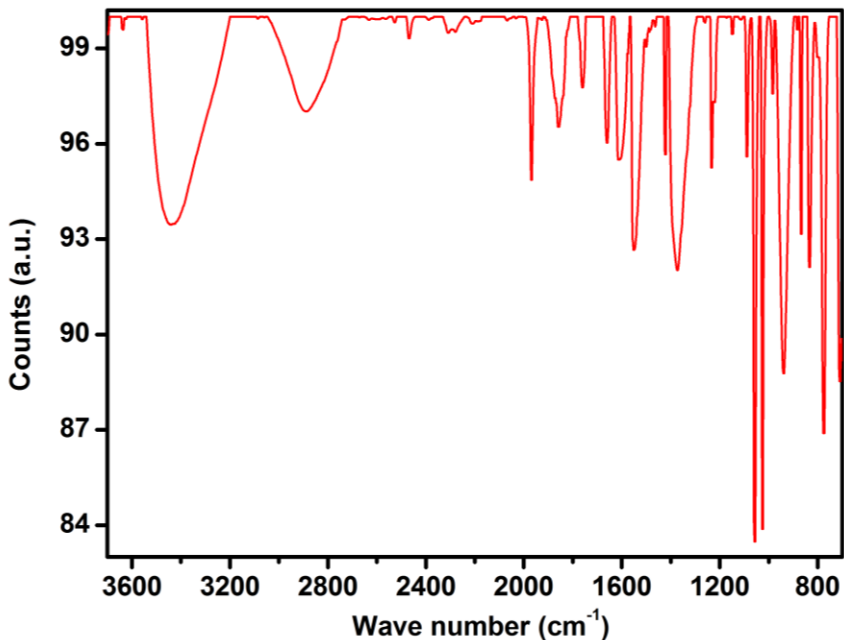

**Figure S6.** Infra red spectra of **1**, showing the various stretching and bending modes present . Selected peaks: IR (KBr pellet,  $\text{cm}^{-1}$ ):  $\nu(\text{O-H})_{\text{solvent}}$ : 3460s;  $\nu(\text{C-H})$ : 2989;  $\nu(\text{COO})$ : 1656s and 1594vs,  $\nu(\text{COO})$ s 1423s, 1373 vs;  $\nu(\text{C=C})$ : 1200 to 800. (Source: *Infrared and Raman Spectra of Inorganic and Coordination Compounds, Part B, Applications in Coordination, Organometallic, and Bioinorganic Chemistry, 6th Edition, Kazuo Nakamoto*)

#### 4. Adsorption Analysis

All gas sorption isotherms were measured on a Micromeritics ASAP 2020HD or 3-FLEX instrument using ultra-high purity gases ( $\geq 4.8$  grade). Samples were transferred to a glass tube for analysis, with dual stage activation: The as-made samples were solvent exchanged by soaking 200mg in 7ml methanol (reagent grade) for 72 hours, with the solvent being replenished every 24hrs. Following this the 100mg of the solvent exchanged sample was transferred to analysis glass vial and evacuated at 70°C on the degas port for 36hrs ( $10^{-6}$  mbar), at which point the outgas rate was  $\leq 2$   $\mu$ bar/min.

The rate of adsorption experiments were carried out on the Micromeritics ASAP2020HD instrument equipped with a ROA software capabilities. Numerous equilibrium points and associated kinetic data were recorded at 273K, however for data analysis regularly spaced 11 CO<sub>2</sub> loading points were picked out in the interval of 0 to 1000mbar.

#### Langmuir Fits:

In most cases the isotherms were fit to the Single-Site Langmuir (SSL) equation. Modified Langmuir equations were utilized to account for significant errors in the Langmuir model. It is widely known that even small fitting errors will have a devastating impact on selectivity calculations. Note: 195K CO<sub>2</sub> and N<sub>2</sub> isotherms were not used as the temperature is too close to the CO<sub>2</sub> phase change temperature.

The isotherms were fit by solving the Langmuir equation using the solver function in Microsoft Excel following a similar protocol to Keller *et al* (*Nat. Protoc.* **2010**, 5, 267–81). Utilizing this routine circumvents some of the problems associated with favoring either high or low pressure regions when linearizing the Langmuir equation (Richter *et al.* *Chem. Eng. Sci.* **1989**, 44, 1609) and offers a balanced approach.

*Single-Site Langmuir (SSL):*

$$q_i = q_m \frac{K_i P}{1 + K_i P}$$

*Dual-Site Langmuir (DSL):*

$$q_i = q_{m,1} \frac{K_1 P}{1 + K_1 P} + q_{m,2} \frac{K_2 P}{1 + K_2 P}$$

*Dual-Site Langmuir (DSL):*

$$q_i = q_{m,1} \frac{K_1 P}{1 + K_1 P} + q_{m,2} \frac{K_2 P}{1 + K_2 P}$$

**Ideal Adsorbed Solution Theory (IAST):**

IAST calculations were undertaken as described by Prausnitz *et al* (*AIChE J.* **1965**, *11*, 121). The selectivity equation is provided below.

*Selectivity:*

$$S_{1,2} = \frac{q_1/q_2}{P_1/P_2}$$

**Table S2.** CO<sub>2</sub> adsorption and desorption data of **1** at 195K

| Absolute Pressure (mmHg) | Amount adsorbed (mmol/g) |
|--------------------------|--------------------------|
| 0.326985                 | 0.994017                 |
| 0.995764                 | 1.802344                 |
| 1.664418                 | 2.463762                 |
| 2.810029                 | 3.395624                 |
| 4.665151                 | 4.677797                 |
| 9.078659                 | 6.326634                 |
| 12.98214                 | 6.955803                 |
| 17.32202                 | 7.374822                 |
| 21.54473                 | 7.647347                 |
| 35.99794                 | 8.201156                 |
| 48.14801                 | 8.476302                 |
| 60.27357                 | 8.679774                 |
| 79.99664                 | 8.918617                 |
| 90.18822                 | 9.016615                 |
| 100.3322                 | 9.1075                   |
| 129.4362                 | 9.302295                 |
| 143.3174                 | 9.383777                 |
| 157.9865                 | 9.462093                 |
| 171.7103                 | 9.526138                 |
| 186.3498                 | 9.589897                 |
| 201.0119                 | 9.649938                 |
| 214.5985                 | 9.699312                 |
| 229.3281                 | 9.752921                 |
| 243.5784                 | 9.799399                 |
| 272.3251                 | 9.880699                 |
| 300.1215                 | 9.957195                 |
| 328.6635                 | 10.02957                 |
| 344.4715                 | 10.07298                 |
| 357.3972                 | 10.1043                  |
| 385.7692                 | 10.16378                 |
| 414.7627                 | 10.22106                 |
| 443.475                  | 10.27739                 |
| 473.2558                 | 10.33604                 |
| 500.6811                 | 10.38649                 |
| 529.3032                 | 10.43835                 |
| 557.9955                 | 10.49106                 |
| 586.8552                 | 10.54366                 |
| 615.5965                 | 10.59726                 |
| 645.4814                 | 10.64686                 |
| 674.0063                 | 10.69388                 |
| 702.613                  | 10.74472                 |
| 666.5468                 | 10.69284                 |

|          |          |
|----------|----------|
| 635.6925 | 10.64847 |
| 604.3189 | 10.59939 |
| 574.3057 | 10.55156 |
| 542.7305 | 10.49995 |
| 512.0017 | 10.45088 |
| 482.4595 | 10.4034  |
| 450.4844 | 10.34625 |
| 419.851  | 10.28622 |
| 388.6154 | 10.21997 |
| 357.8197 | 10.15184 |
| 327.6313 | 10.08352 |
| 296.299  | 10.00777 |
| 265.7375 | 9.926239 |
| 235.2899 | 9.83405  |
| 204.7804 | 9.731097 |
| 173.999  | 9.609619 |
| 143.3287 | 9.457468 |
| 112.362  | 9.269522 |
| 81.5944  | 9.008897 |
| 50.62249 | 8.595077 |
| 35.36989 | 8.2579   |
| 19.97945 | 7.627915 |
| 12.14666 | 6.920757 |
| 4.473279 | 4.62628  |
| 1.00466  | 1.833463 |



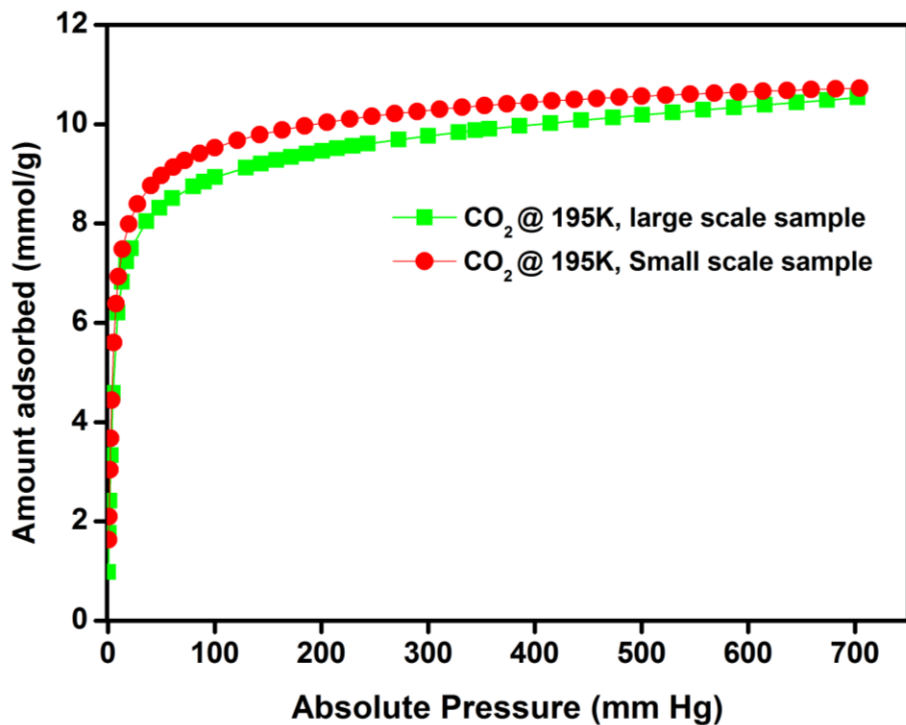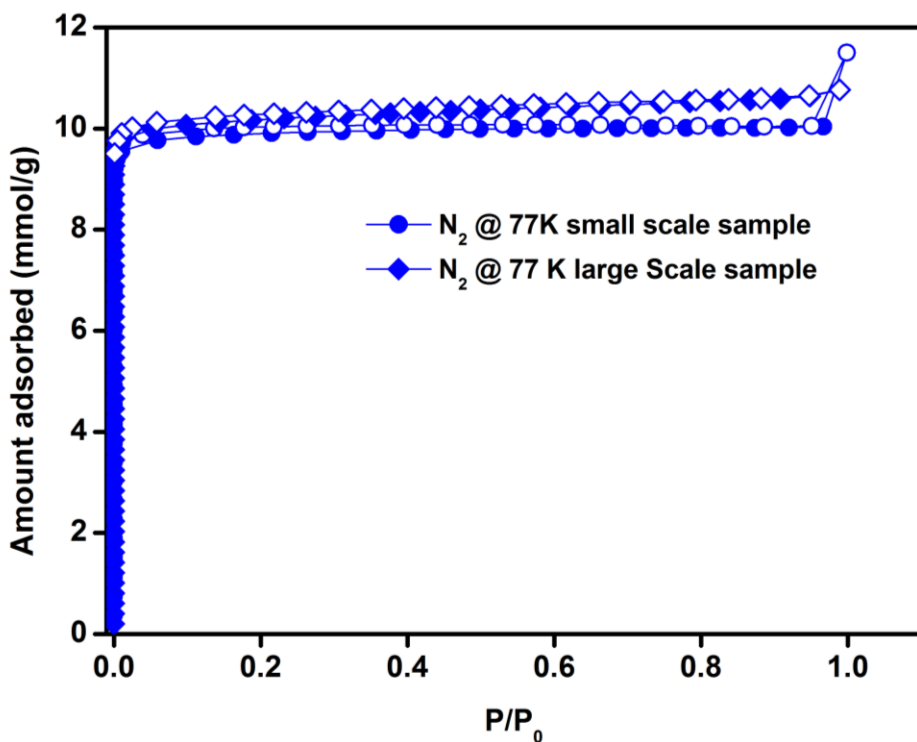

**Figure S7.** Comparison of the 195K CO<sub>2</sub> and 77K N<sub>2</sub> adsorption isotherms of the mg and gm scale syntheses, showing the laboratory scale scalability. The DFT done to the adsorption branch of the isotherm gives a pore size of 5.76Å and is consistent with the PSD obtained from the Howarth-Kawazoe.

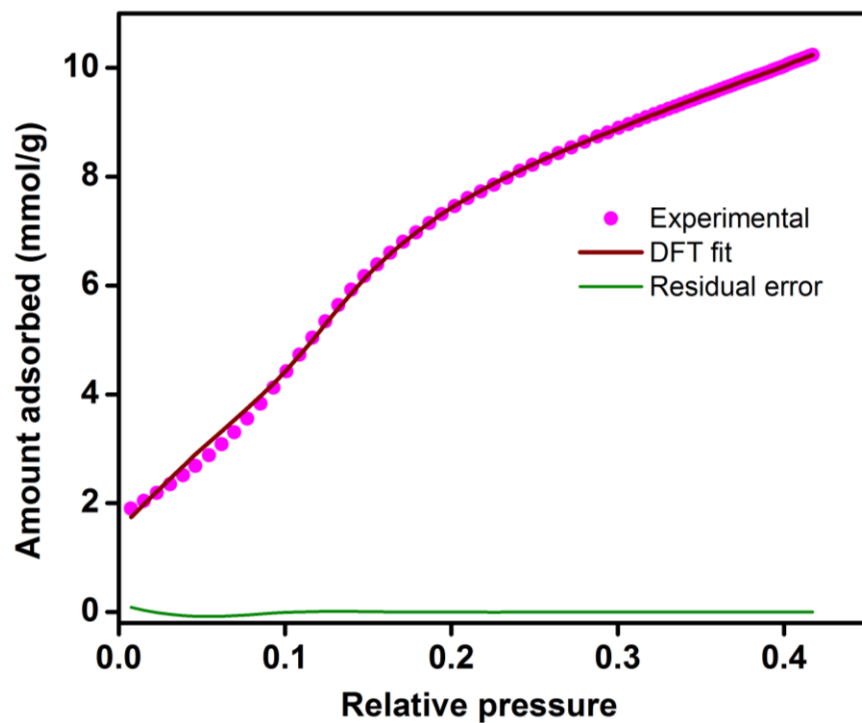

**Figure S8.** Shows the fitting comparison obtained for the NLDFT fit done to the adsorption branch of the 195K CO<sub>2</sub> data.

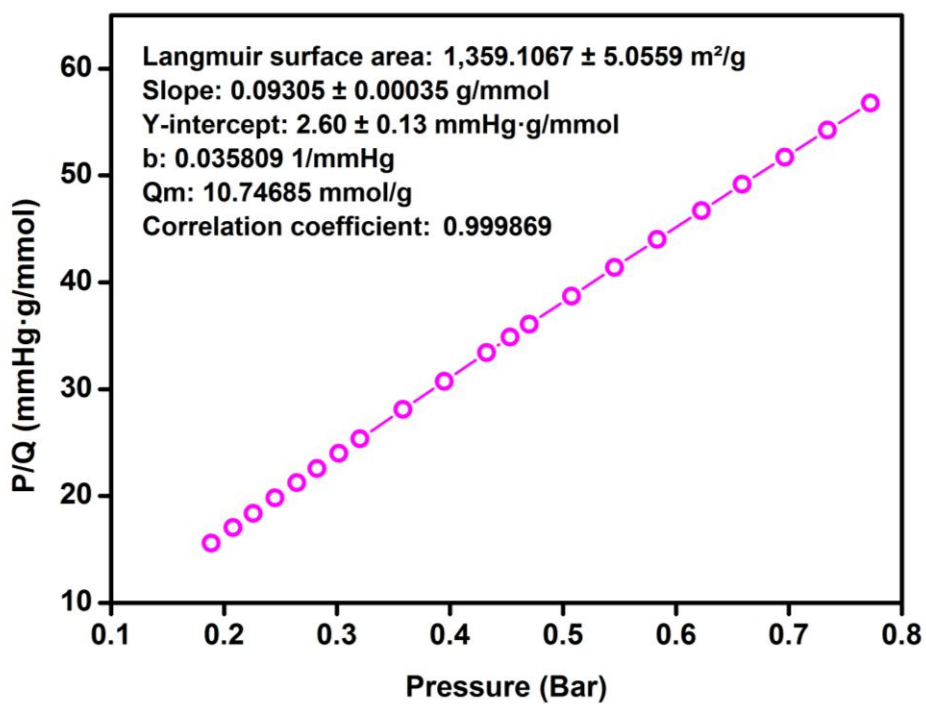

**Figure S9.** Shows the fitting comparison obtained for the Langmuir model done to the adsorption branch of the 195K CO<sub>2</sub> data.

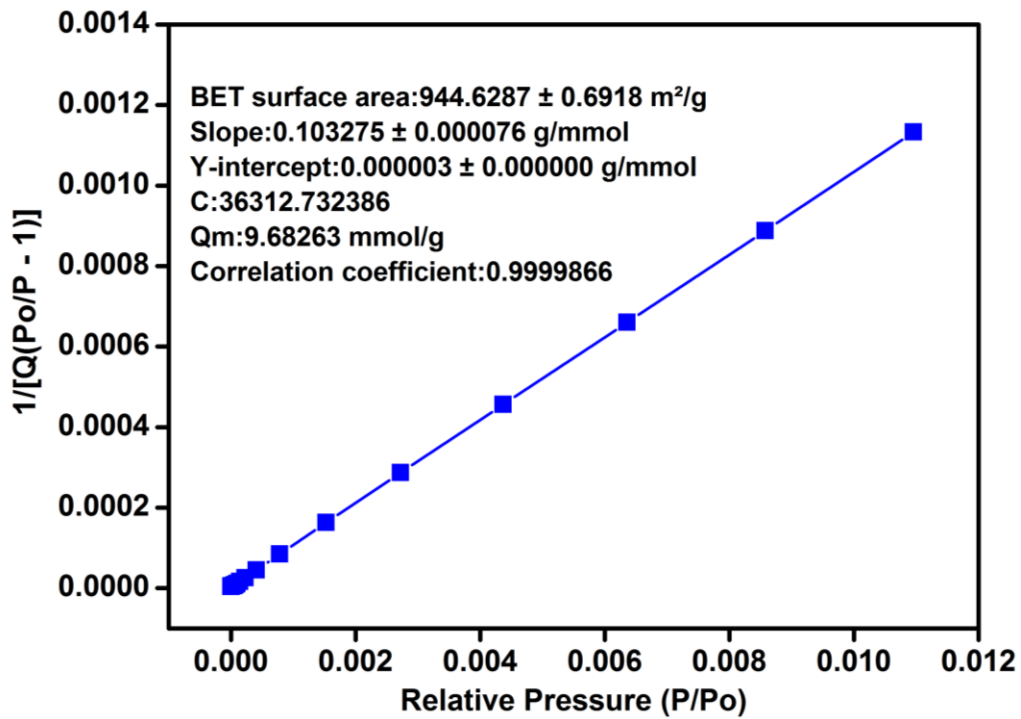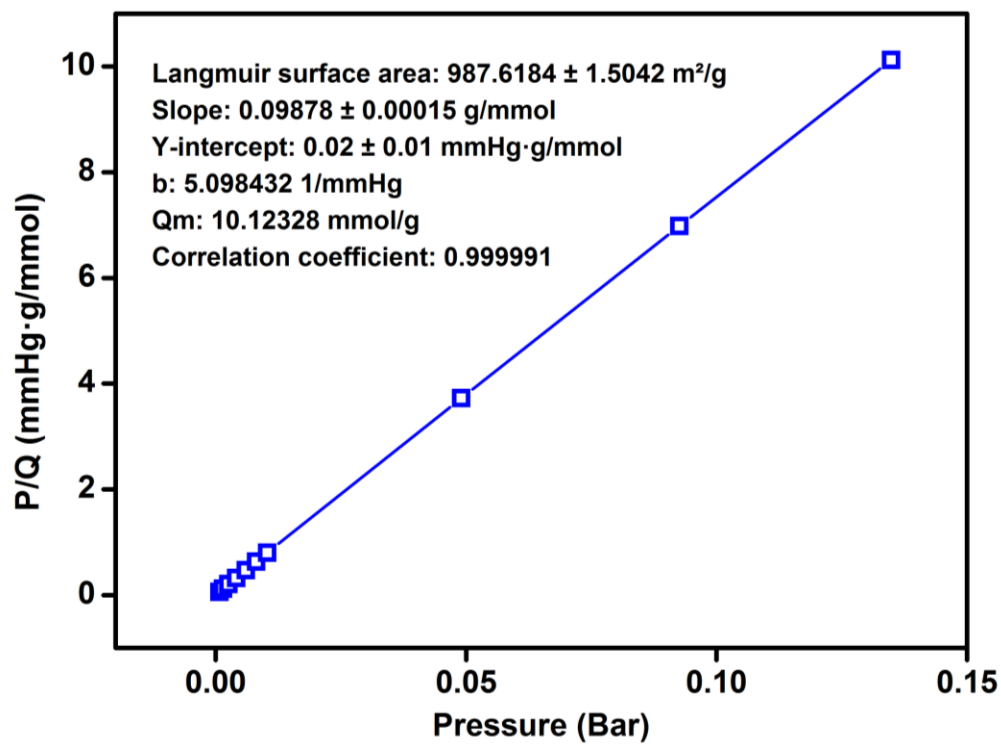

Figure S10. BET and Langmuir fits from the 77K N<sub>2</sub> data.

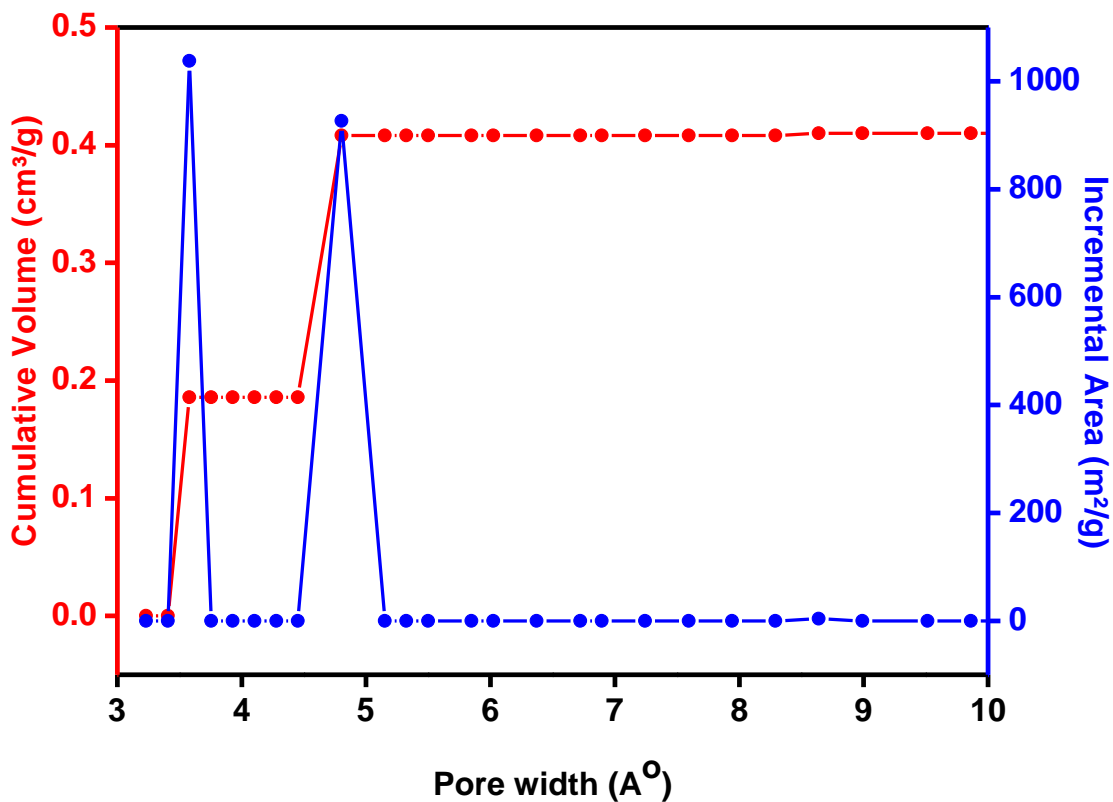

**Figure S11.** Pore size distribution in **1** obtained by fitting the NLDFT model to the 195K CO<sub>2</sub> adsorption branch. Note the presence of a bimodal distribution with pores of dimensions ~3.5 and ~4.8 Å. This agrees well with the ultra-micropores observed in the single crystal structure.

### ***Column Breakthrough Test Set-up, Procedure:***

About 10-12 gm of **1** was loaded onto a stainless column fitted with mass flow controllers and pressure gauges to control the inlet and outlet pressures. **1** was subjected to a pretreatment by heating at 70°C under vacuum for 24 hours within the adsorption column. The CO<sub>2</sub>/H<sub>2</sub> and CO<sub>2</sub>/He breakthrough experiments were carried out using the RuboLab / Rubotherm VariPSA system. This instrument allows the measurement of breakthrough curves (BTC) on solid sorbent materials. Based on the sorbent the system settings were optimized. The adsorber column was designed to be approx. 8 ml in volume. To measure the sorption based temperature (adsorption front), three temperature sensors were integrated to measure the temperature at two different positions within the adsorber bed. (Thermocouple type K, 3 mm diameter of temperature sensor). The gas flow across the column was controlled using a micrometering valve. All measurements were performed by using a gas flow of 0.75 L/min. While the adsorption of CO<sub>2</sub> was indicated by its retention time on the column, the complete breakthrough of CO<sub>2</sub> was indicated by the downstream gas composition reaching that of the feed gas. Using the formula,

number of mole adsorbed  $n = F * C_i * t$ , where  $F$  = molar flow,  $C_i$  = concentration of  $i^{\text{th}}$  component and  $t$  = retention time, the CO<sub>2</sub> uptake was calculated to be 2.6mmol/g for the 40CO<sub>2</sub>/60He mixture and this uptake closely matched with the uptake obtained for the 40CO<sub>2</sub>/60H<sub>2</sub> mixture.

## 5. Pore size determination from Positron Annihilation Lifetime Spectroscopy (PALS)

### Experiment

The PALS measurements were carried out at the positron facility of the NC State University. SN-322 or Ni-(4PyC), **1**, was characterized at RT before and after its thermal activation. Due to the small quantity of **1**, the aqueous  $^{22}\text{NaCl}$  positron source was deposited and dried on a piece of Tungsten foil (4mm in diameter), and the sample was directly placed on top of this one-sided source. In this configuration, half of the positrons from the source would be emitted towards the Tungsten foil. However, with the help of the high atomic number of Tungsten, approximately 40% of these positrons would be backscattered into the sample. Therefore, there would be ~70% of all the positrons implanted into the sample, while 30% into the Tungsten. The source and the sample were under vacuum throughout the process of heating and PALS measurement. The first time annealing of the sample was conducted at 90°C for 24hrs. Another annealing at 100°C for 24hrs was done after the sample cooled down to RT and the PALS spectrum was taken.

### PALS Results

The background subtracted and peak normalized PALS spectra of the as-received and the annealed sample are shown together in figure S12. There is a slight change in PALS spectrum after the annealing at 90°C, however, it is obvious that the most dramatic change occurs after the heating to 100°C. The spectra were best fitted, using a least-square fitting program, POSFIT, with three lifetime components, as shown in table S3. Here the third lifetime ( $\tau_3$ ) and its intensity ( $I_3$ ) are due to the o-Ps annihilation that is most interesting to us. Based on the well-established Tao-Eldrup model (S. J. Tao, *J. Chem. Phys.* 56, 5499 (1972), M. Eldrup, *Chem. Phys.* 63, 51 (1981), this 1.2-1.4 ns component can be converted to a spherical pore size of 3.9-4.4Å, which is fairly consistent with the chemical structure of **1** as well as the CO<sub>2</sub> adsorption result at 195K. In the CO<sub>2</sub> adsorption data, however, the measured pore size distribution is bimodal, while the PALS results appear to be consistent with the average of the sizes of these two pore populations. This is not surprising since the two pore sizes measured by CO<sub>2</sub> adsorption, ~3.6Å and ~4.9Å, are very close to each other, corresponding to o-Ps lifetimes of 1.1ns and 1.6ns and could not have been separated from the fitting program.

**Table S3. Discrete fitting results of Ni-4PyC, 1**

| Treatment     | $\tau_1$ (ns) | I1 (%) | $\tau_2$ (ns) | I2 (%)   | $\tau_3$ (ns) | I3 <sup>†</sup> (%) |
|---------------|---------------|--------|---------------|----------|---------------|---------------------|
| As Received   | 0.263±0.008*  | 72±2   | 0.620±0.031   | 24.8±1.7 | 1.44±0.07     | 3.54±0.64           |
| 90°C, 24 hrs  | 0.271±0.008   | 63±3   | 0.639±0.036   | 32.8±1.5 | 1.21±0.09     | 4.6±1.7             |
| 100°C, 24 hrs | 0.228±0.011   | 51±3   | 0.494±0.019   | 34.6±2.6 | 1.24±0.01     | 14.1±0.4            |

\*Errors are statistical errors of the fitting

<sup>†</sup>The o-Ps intensities are not corrected to account for the fact that 30% of the positrons are implanted into the Tungsten source

Note: SN322 refers to material Ni-4PyC, 1.

The o-Ps intensity (I3 in table S3) increased noticeably after the first annealing at 90°C, and jumped drastically from 4.6% to 14.1% after heating to 100°C. Within the same chemical environment, this change of o-Ps intensity can be directly correlated to the change of porosity. Obviously, most of the activation of the SN-322 occurred after the second annealing when the porosity increased significantly.

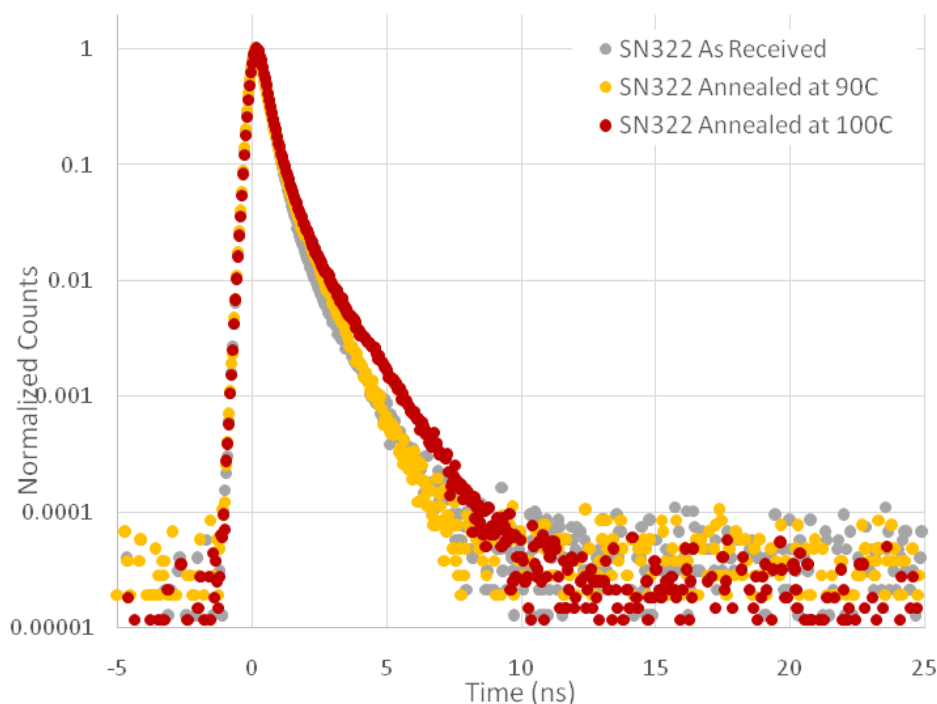

**Figure S12.** The background noise corrected and peak normalized PALS spectra of SN322 taken at RT before and after the thermal annealing. Note: SN322 refers to material Ni-4PyC, 1.

**6. VIRIAL:**

The CO<sub>2</sub> adsorption data for **1** were measured from 0- 1bar at 263, 273, 283, 303K and were fitted by the virial equation (1) .

$$\ln(P) = \ln(Va) + (A0 + A1*Va + A2*Va^2 \dots + A6*Va^6)/T + (B0 + B1*Va) \dots \dots \dots (1)$$

Where P is pressure, Va is amount adsorbed, T is temperature, and A0, A1, A2 ... , A4 and B0, B1

are temperature independent empirical parameters (Figs. S.15 and S16)

**Table S4:** Summary of the fitted Virial parameters

|    |              |
|----|--------------|
| A0 | -4015.961213 |
| A1 | 769.7356334  |
| A2 | -169.8811741 |
| A3 | 7.424735813  |
| A4 | 0.247999083  |
| B0 | 17.90621071  |
| B1 | -2.117488599 |
| B2 | 0.52322824   |

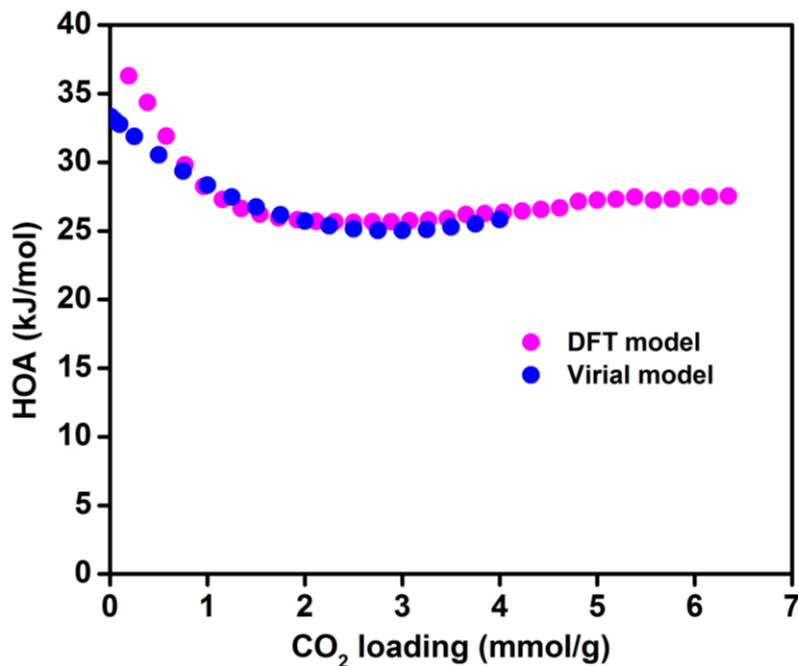

**Figure S13.** Comparison of the HOA trend obtained from the virial and DFT modeling done using the CO<sub>2</sub> isotherms carried out at -10°C, 0°C, +10°C and +30°C.



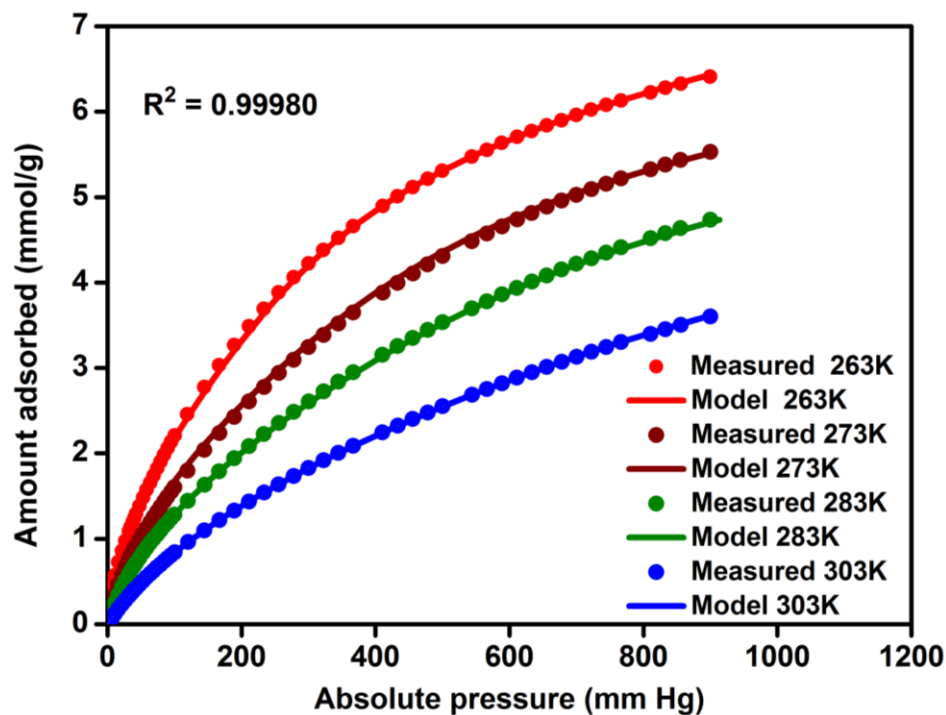

Figure S14. Comparison of experimental isotherms to the ones obtained from virial modeling carried out using CO<sub>2</sub> isotherms collected at -10°C, 0°C, +10°C and +30°C.

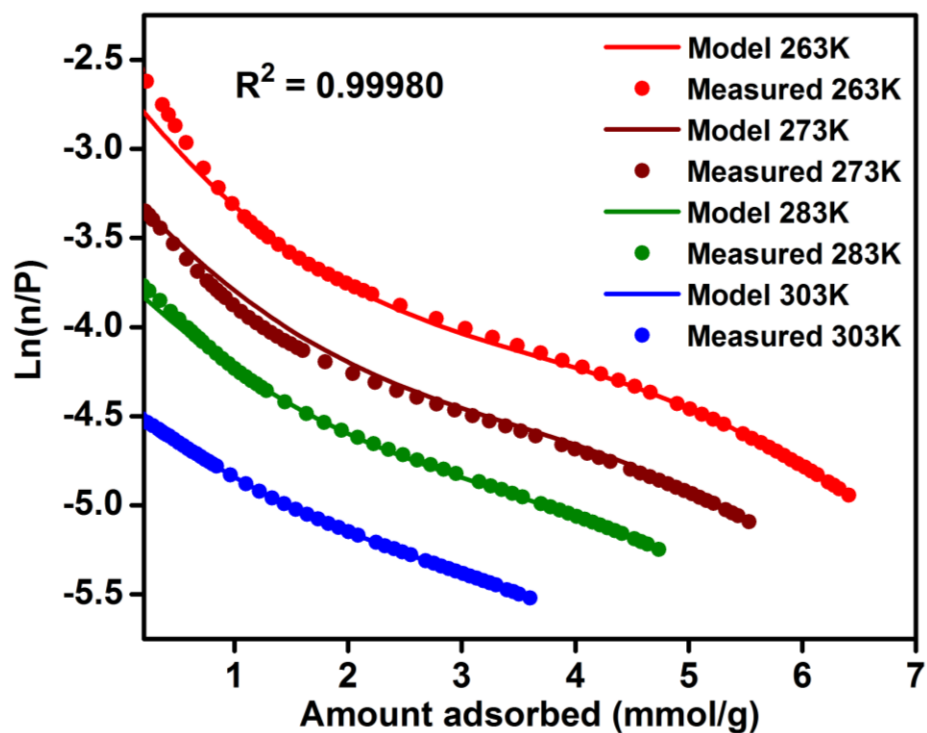

Figure S15. Virial plots carried out using CO<sub>2</sub> isotherms collected at -10°C, 0°C, +10°C and +30°C.

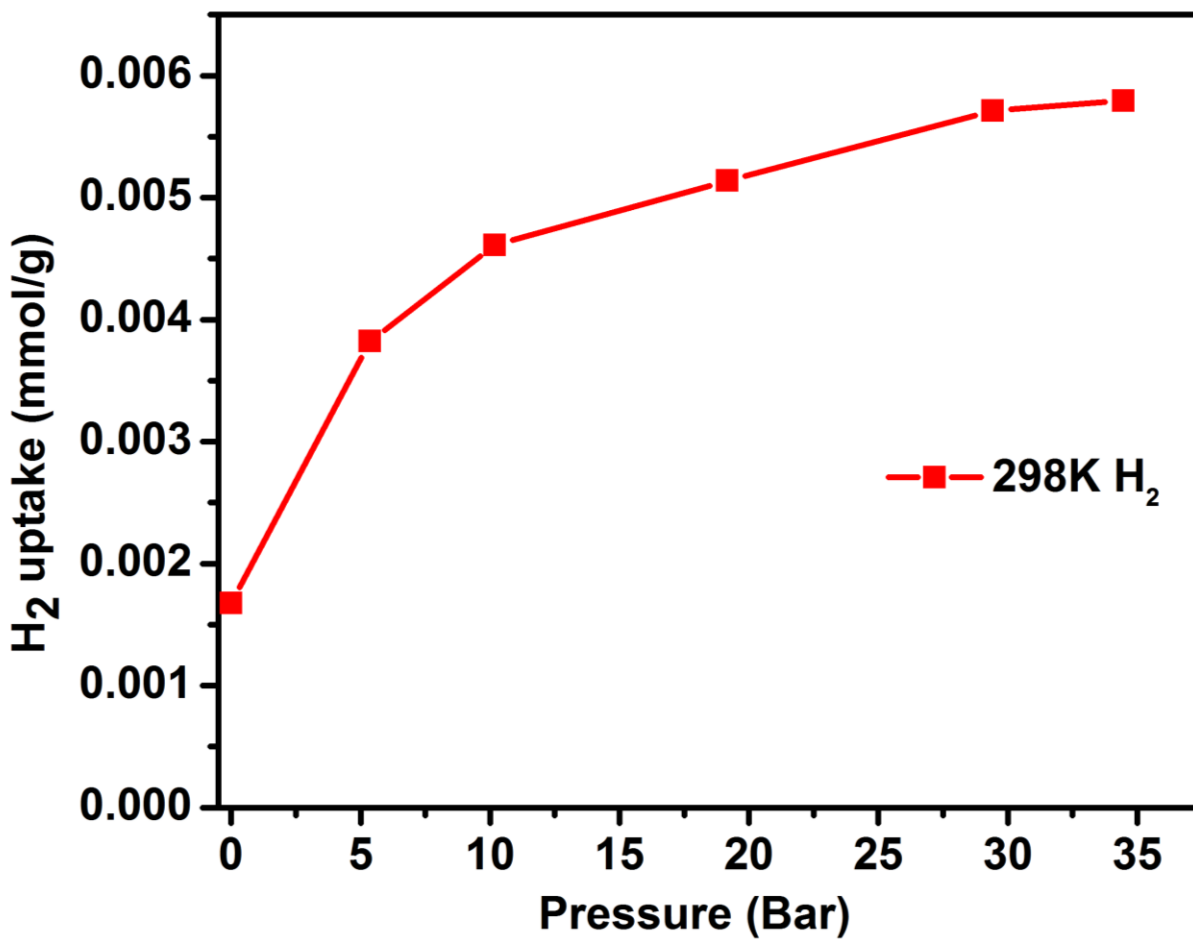

Figure S16. High pressure H<sub>2</sub> isotherm of **1** measured at 298K.

7. Simulation results: HOA, Selectivities, Working capacities

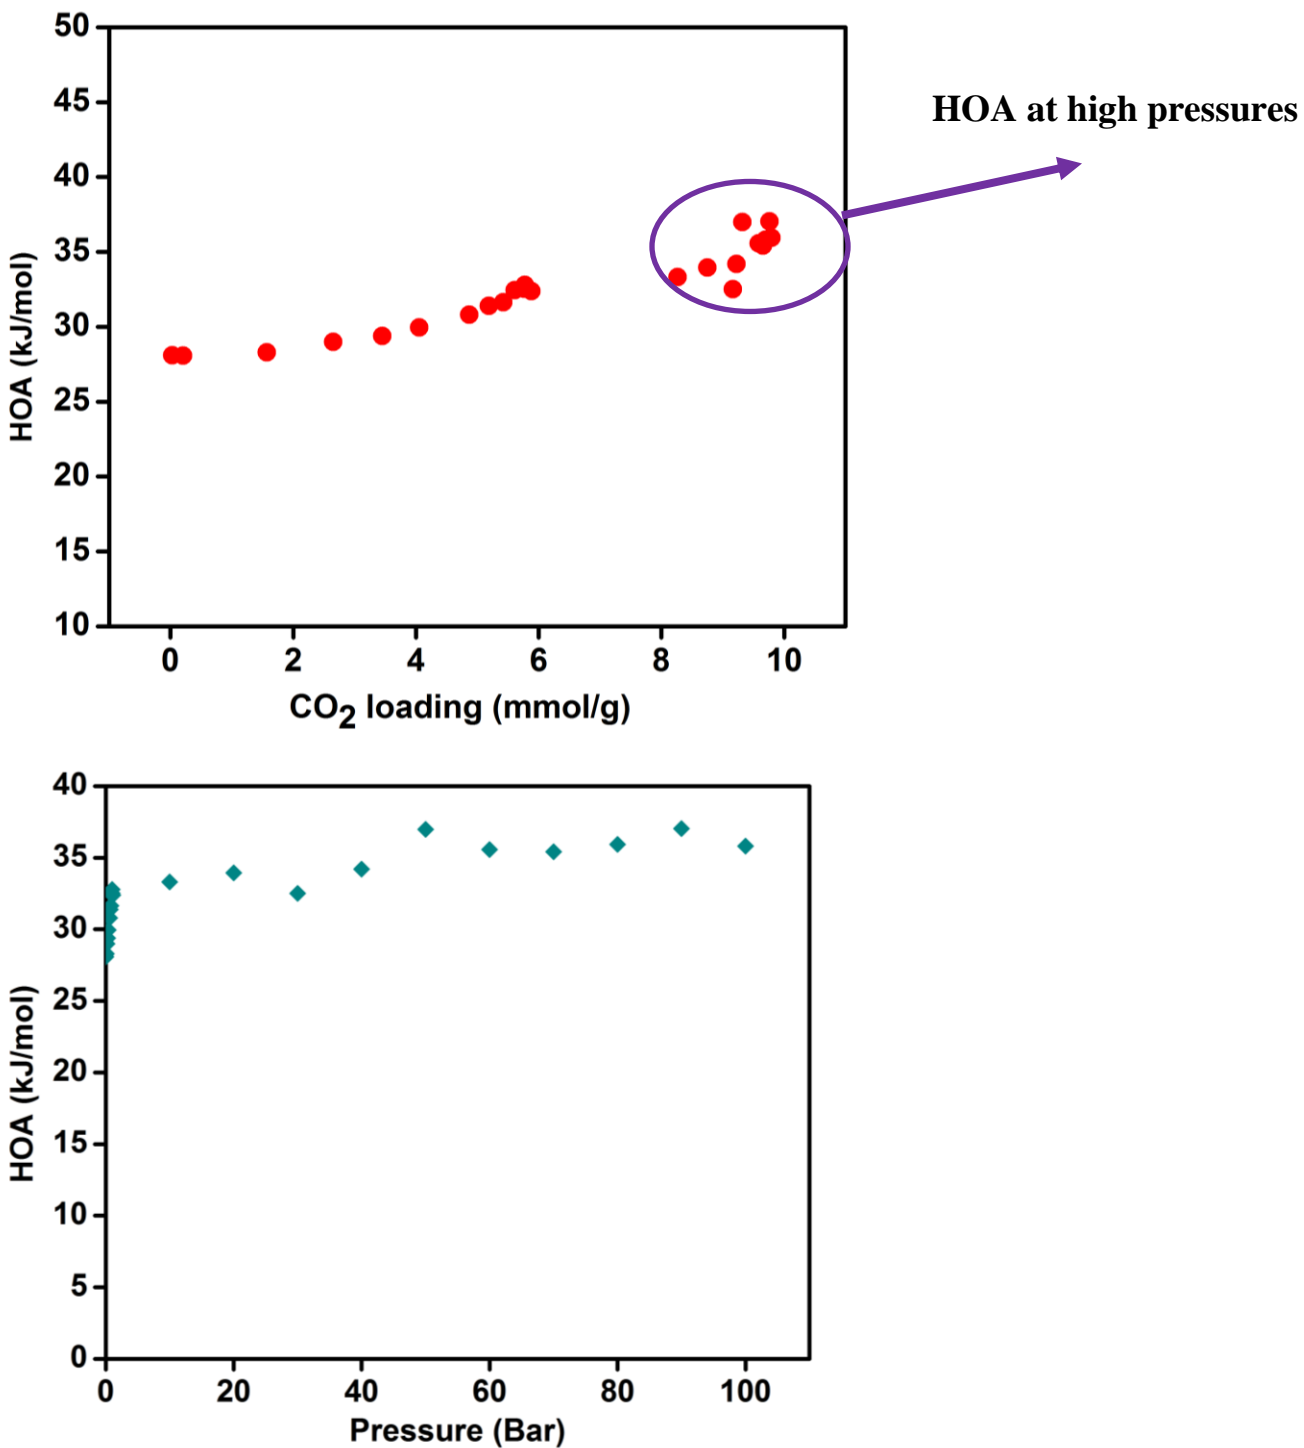

**Figure S17.** Simulated HOA plots. The HOA climbs up from 28 to 35kJ/mol as we go from ambient to higher pressures. Importantly, the simulations indicate increased CO<sub>2</sub>-CO<sub>2</sub> interactions at higher pressures

or around the saturation limit. However, when the CO<sub>2</sub> per unit cell goes beyond the value of 28 molecules/unit cell, they start to interact unfavorably.

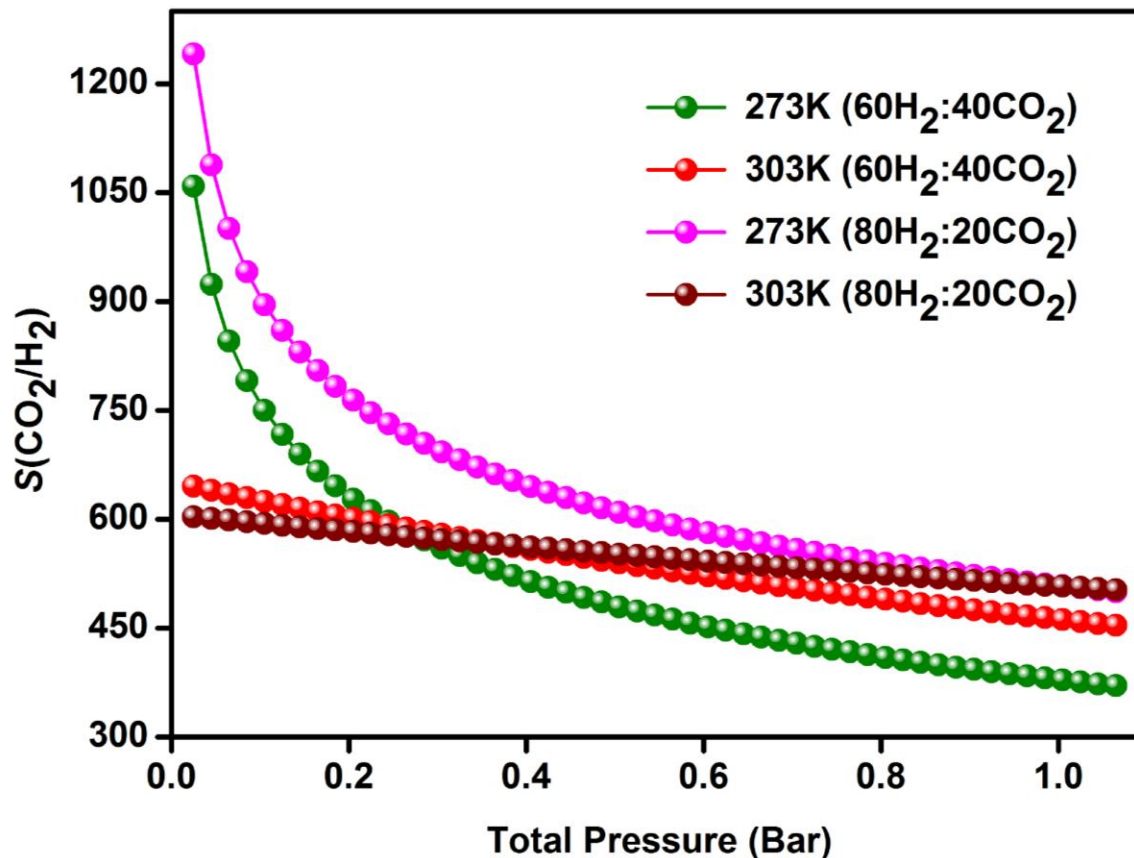

**Figure S18.** CO<sub>2</sub> selectivity over H<sub>2</sub> calculated using the 273 and 303K pure component adsorption isotherms employing the *I*AST model with a nominal composition of 60H<sub>2</sub>:40CO<sub>2</sub> (pre-combustion mix) and 80H<sub>2</sub>:20H<sub>2</sub> (H<sub>2</sub> purification mix).

**Table S5.** Uptakes and selectivities of **1** for the binary CO<sub>2</sub>/H<sub>2</sub> (40:60) mixture at relevant ratios for (pre-combustion) gas mixtures and at a range of pressures.

| Temp. (K)  | H <sub>2</sub>       |                        |                 |                 | CO <sub>2</sub>        |                 |                 |               |
|------------|----------------------|------------------------|-----------------|-----------------|------------------------|-----------------|-----------------|---------------|
|            | Total Pressure (bar) | Partial Pressure (Bar) | Uptake (mmol/g) | HOA (kcal/mol)  | Partial Pressure (Bar) | Uptake (mmol/g) | HOA (kcal/mol)  | Selectivity   |
| <b>298</b> | 0.1                  | 0.06                   | 0.01            | 1.916722        | 0.04                   | 0.74            | 6.746425        | 155.23        |
| <b>298</b> | 0.5                  | 0.3                    | 0.02            | 1.934813        | 0.2                    | 2.63            | 6.772709        | 212.56        |
| 298        | <b>1</b>             | <b>0.6</b>             | <b>0.02</b>     | 2.017664        | <b>0.4</b>             | <b>3.99</b>     | <b>7.149067</b> | <b>255.73</b> |
| <b>298</b> | 5                    | 3                      | 0.03            | 2.177165        | 2                      | 6.64            | 7.871504        | 299.35        |
| 298        | <b>10</b>            | <b>6</b>               | <b>0.04</b>     | <b>2.266527</b> | <b>4</b>               | <b>7.43</b>     | <b>8.843813</b> | <b>284.01</b> |
| <b>298</b> | 15                   | 9                      | 0.04            | 2.389506        | 6                      | 7.79            | 7.912919        | 272.02        |
| <b>298</b> | 20                   | 12                     | 0.05            | 2.981388        | 8                      | 7.96            | 9.437865        | 248.50        |
| <b>298</b> | 25                   | 15                     | 0.05            | 2.292341        | 10                     | 8.18            | 8.908687        | 244.10        |
| <b>298</b> | 30                   | 18                     | 0.05            | 1.559741        | 12                     | 8.40            | 7.782887        | 233.46        |
| <b>298</b> | 35                   | 21                     | 0.06            | 1.866219        | 14                     | 8.38            | 7.37276         | 207.84        |
| <b>298</b> | 40                   | 24                     | 0.06            | 2.261786        | 16                     | 8.40            | 7.991161        | 196.83        |
| <b>313</b> | 0.1                  | 0.06                   | 0.01            | 1.921853        | 0.04                   | 0.45            | 6.649933        | 105.05        |
| <b>313</b> | 0.5                  | 0.3                    | 0.02            | 1.987563        | 0.2                    | 1.77            | 6.627739        | 141.73        |
| <b>313</b> | <b>1</b>             | <b>0.6</b>             | <b>0.03</b>     | <b>2.011913</b> | <b>0.4</b>             | <b>2.86</b>     | <b>6.97541</b>  | <b>168.15</b> |
| <b>313</b> | 5                    | 3                      | 0.04            | 2.14258         | 2                      | 5.86            | 7.700496        | 228.55        |
| 313        | <b>10</b>            | <b>6</b>               | <b>0.04</b>     | <b>2.724534</b> | <b>4</b>               | <b>6.81</b>     | <b>8.800282</b> | <b>229.29</b> |
| <b>313</b> | 15                   | 9                      | 0.05            | 2.253633        | 6                      | 7.18            | 8.555156        | 209.98        |
| <b>313</b> | 20                   | 12                     | 0.06            | 1.926066        | 8                      | 7.44            | 7.397351        | 196.21        |
| <b>313</b> | 25                   | 15                     | 0.06            | 1.938403        | 10                     | 7.59            | 8.151489        | 187.26        |
| <b>313</b> | 30                   | 18                     | 0.06            | 2.111824        | 12                     | 7.75            | 8.515188        | 182.93        |
| <b>313</b> | 35                   | 21                     | 0.07            | 2.213399        | 14                     | 7.90            | 8.549941        | 176.87        |
| <b>313</b> | 40                   | 24                     | 0.07            | 2.758015        | 16                     | 8.03            | 9.403098        | 170.65        |

**Table S6.** Uptakes and selectivities of **1** for the binary CO<sub>2</sub>/H<sub>2</sub> (20:80) mixture at relevant ratios for (H<sub>2</sub> Purification) gas mixtures and at a range of pressures.

| #T/K | H2             |                       |               |                 | CO2                   |                 |                 |               |
|------|----------------|-----------------------|---------------|-----------------|-----------------------|-----------------|-----------------|---------------|
|      | Total Pressure | Partial pressure(bar) | Uptake mmol/g | HOA (kcal/mol)  | partial pressure(bar) | Uptake (mmol/g) | HOA (kcal/mol)  | selectivity   |
| 298  | 0.1            | 0.08                  | 0.01          | 1.920102        | 0.02                  | 0.40            | 6.735667        | 166.75        |
| 298  | 0.5            | 0.4                   | 0.03          | 1.963284        | 0.1                   | 1.56            | 6.852318        | 238.82        |
| 298  | <b>1</b>       | <b>0.8</b>            | <b>0.04</b>   | <b>2.005648</b> | <b>0.2</b>            | <b>2.67</b>     | <b>6.908323</b> | <b>302.96</b> |
| 298  | 5              | 4                     | 0.07          | 2.048397        | 1                     | 5.75            | 7.85293         | 350.34        |
| 298  | <b>10</b>      | <b>8</b>              | <b>0.07</b>   | <b>2.074195</b> | <b>2</b>              | <b>6.69</b>     | <b>7.356118</b> | <b>409.13</b> |
| 298  | 15             | 12                    | 0.08          | 2.243754        | 3                     | 7.04            | 7.623559        | 359.52        |
| 298  | 20             | 16                    | 0.08          | 2.108895        | 4                     | 7.36            | 8.261807        | 353.53        |
| 298  | 25             | 20                    | 0.09          | 1.776085        | 5                     | 7.51            | 8.351958        | 327.75        |
| 298  | 30             | 24                    | 0.09          | 2.133306        | 6                     | 7.85            | 7.918106        | 336.14        |
| 298  | 35             | 28                    | 0.11          | 2.199715        | 7                     | 7.77            | 8.343457        | 289.47        |
| 298  | 40             | 32                    | 0.11          | 1.239039        | 8                     | 7.89            | 6.465226        | 286.11        |
| 313  | 0.1            | 0.08                  | 0.01          | 1.94776         | 0.02                  | 0.24            | 6.660496        | 111.58        |
| 313  | 0.5            | 0.4                   | 0.03          | 1.972521        | 0.1                   | 1.02            | 6.764387        | 162.14        |
| 313  | <b>1</b>       | <b>0.8</b>            | <b>0.04</b>   | <b>2.000007</b> | <b>0.2</b>            | <b>1.76</b>     | <b>6.703865</b> | <b>194.51</b> |
| 313  | 5              | 4                     | 0.08          | 1.923165        | 1                     | 4.66            | 6.985618        | 233.05        |
| 313  | <b>10</b>      | <b>8</b>              | <b>0.08</b>   | <b>2.107586</b> | <b>2</b>              | <b>5.80</b>     | <b>7.90553</b>  | <b>285.51</b> |
| 313  | 15             | 12                    | 0.09          | 2.23058         | 3                     | 6.43            | 8.130206        | 293.01        |
| 313  | 20             | 16                    | 0.10          | 2.033347        | 4                     | 6.76            | 7.562858        | 278.76        |
| 313  | 25             | 20                    | 0.11          | 2.754483        | 5                     | 7.01            | 9.073617        | 265.68        |
| 313  | 30             | 24                    | 0.11          | 2.423217        | 6                     | 7.15            | 8.690889        | 249.17        |
| 313  | 35             | 28                    | 0.12          | 2.050799        | 7                     | 7.27            | 8.064731        | 249.39        |
| 313  | 40             | 32                    | 0.13          | 2.1477          | 8                     | 7.33            | 8.162616        | 219.81        |

**Table S7.** Working capacities and selectivities for a PSA from 10 bar to 1 bar at 313 K at the relevant H<sub>2</sub>/CO<sub>2</sub> gas mixtures for H<sub>2</sub> purification (80:20) and precombustion CO<sub>2</sub> capture (60:40) for integrated gasification and combined cycle (IGCC) systems.

| Material                | H <sub>2</sub> Purification Working Capacity (mol/kg) | H <sub>2</sub> Purification Selectivity | Precombustion CO <sub>2</sub> Capture Working Capacity (mol/kg) | Precombustion CO <sub>2</sub> Capture Selectivity |
|-------------------------|-------------------------------------------------------|-----------------------------------------|-----------------------------------------------------------------|---------------------------------------------------|
| Ni-4PyC                 | 4.05                                                  | 285                                     | 3.95                                                            | 229                                               |
| Activated Carbon JX101  | 1.90                                                  | 94                                      | 3.00                                                            | 75                                                |
| Zeolite 13x             | 2.20                                                  | 320                                     | 1.90                                                            | 250                                               |
| Mg <sub>2</sub> (dobdc) | 3.20                                                  | 610                                     | 4.00                                                            | 450                                               |
| Cu-BTtri                | 3.00                                                  | 31                                      | 5.00                                                            | 28                                                |

**Calculation of working capacity based on 313K mixed component isotherm for 10bar to 1bar PSA:**

*Working Capacity:* This is a measure of how much carbon dioxide adsorbs from a gas mixtures in an adsorption unit over a given pressure swing. With a standard 40:60 and 20:80 CO<sub>2</sub>:H<sub>2</sub> mix-component isotherm @ 313K and a pressure swing of 10bar to 1bar yields a working capacity of 4.1 and 3.95 mmol g<sup>-1</sup> respectively.

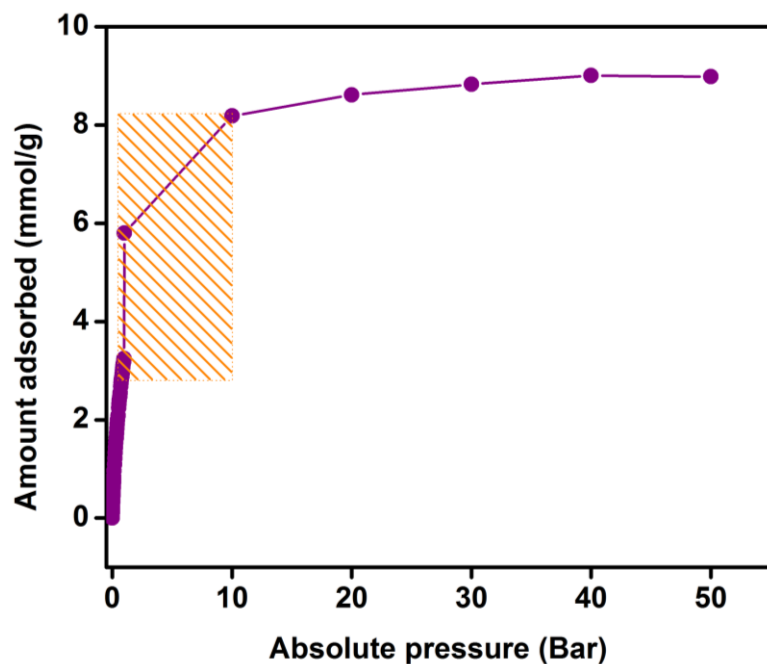

**Figure S19.** Working capacity 5.0 mmol/g for a PSA (10bar to 1bar) at 298K for the pure component.

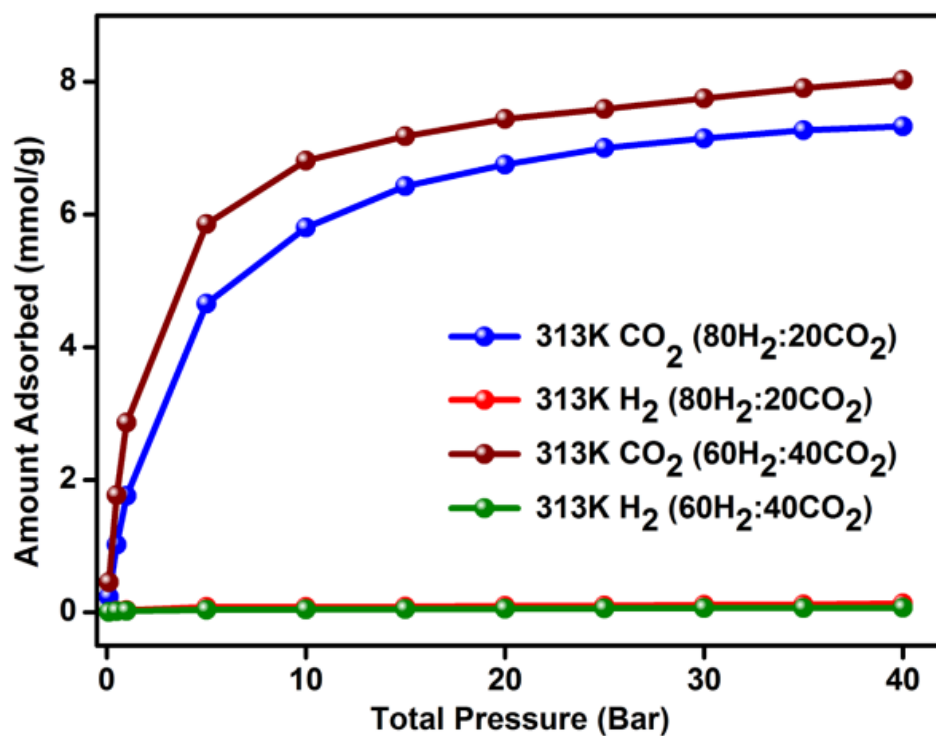

**Figure S20.** Isotherms simulated from a hydrogen purification (80H<sub>2</sub>:20CO<sub>2</sub>) and pre-combustion mixture (60H<sub>2</sub>:40CO<sub>2</sub>).

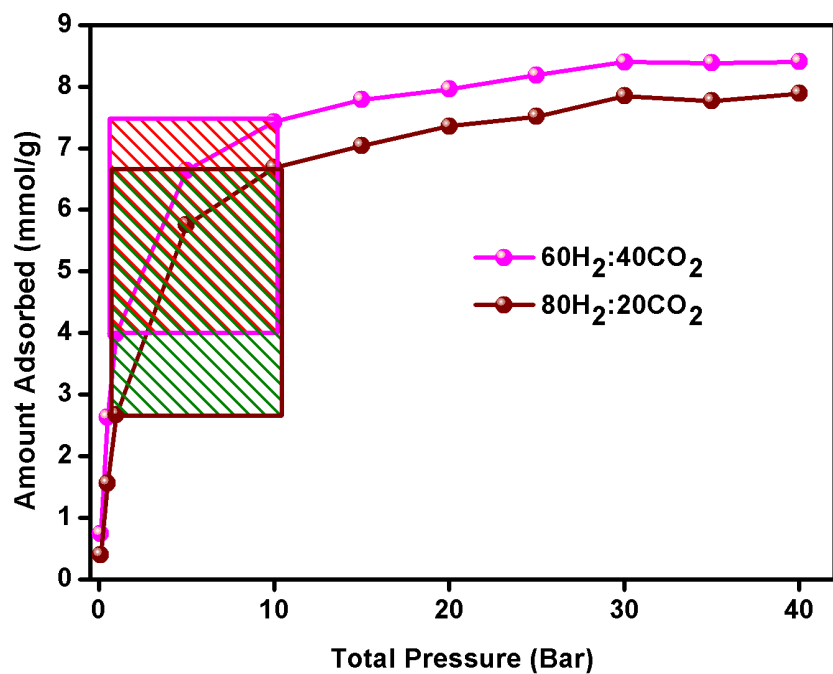

**Figure S21.** Working capacity for a PSA (10bar to 1bar) at 298K for the gas mixture with 60H<sub>2</sub>:40CO<sub>2</sub> and 80H<sub>2</sub>:20CO<sub>2</sub>.



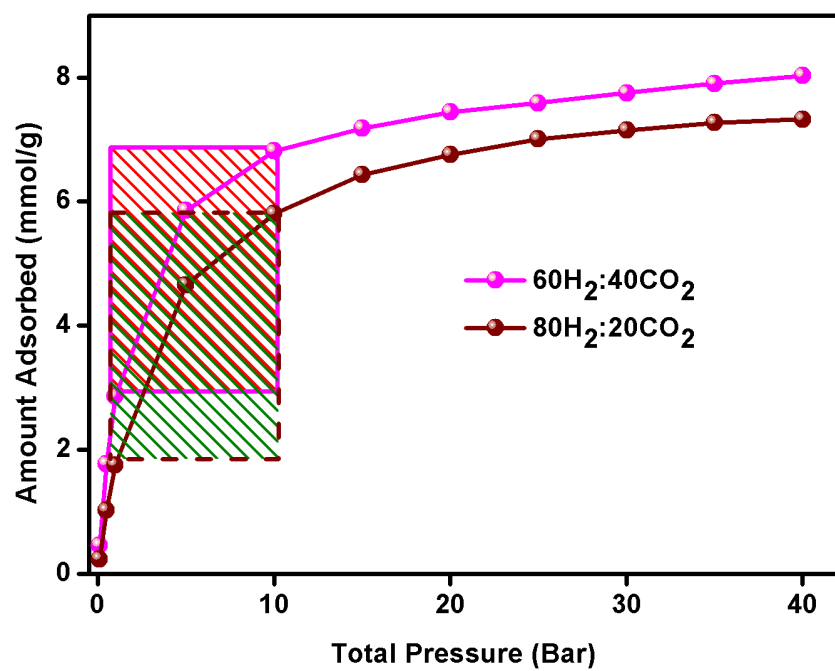

**Figure S22.** Working capacity for a PSA (10bar to 1bar) at 313K for the flue gas mixture with 60H<sub>2</sub>:40CO<sub>2</sub> and 80H<sub>2</sub>:20CO<sub>2</sub>.

## 8. Stability studies

Mentioned in this section are some of the important requirements for any MOF when it comes to its potential industrial application. These ultra and microporous MOFs are quite interesting owing to their good stability to solvent removal as compare to the large pore MOFs which in many cases require highly demanding moisture free handling and in spite of that tend to show partial to complete loss of long range order. **1** has excellent shelf-life and they retain complete porosity even after 6 months. Additionally, the hydrolytic stability of the material was confirmed by exposing the material to steam for over 7 days. **1** loses < 5% porosity after 2 days (calculated from 77K N<sub>2</sub> and 195K CO<sub>2</sub> isotherms) and no further loss was observed even after 7 days.

To substantiate the stability of the material not only from crystallinity, but further from the intactness of porosity, we have carried out gas adsorption studies on samples subjected to operational conditions (Figs. S26-S29). Having had suggested the potential use of **1** at high pressures it becomes important to weigh up the hydrostatic stability of **1**. Many MOFs have been reported to lose substantial amount of their porosity due to amorphization at high pressures.(Ref 43 of main text) When **1** was subjected to ~70bar (0.5 tons) for about 24hrs and it did not show any amorphization as evidenced from the PXRD and gas adsorption (Fig. S28).

We believe that when proposing a MOF for as an solid adsorbent for gas capture applications it is important to evaluate its gas uptakes across multiple syntheses and across repeated adsorption-desorption cycles, however **1** showed excellent synthetic homogeneity across batches and also good repeatability of its CO<sub>2</sub> uptake as evidenced from the adsorption studies and cycling studies from TGA. PXRD studies indicate the complete retention of crystallinity after nearly 16 cycles of CO<sub>2</sub> and N<sub>2</sub> adsorption followed by exposing to atmosphere for a month. Retaining such high degree of crystallinity in large pore MOFs could be tricky. In

addition, **1** could be scaled-up to 10gm with ease and the product showed comparable crystallinity and similar gas sorption characteristics (Figs. S3 and S7).

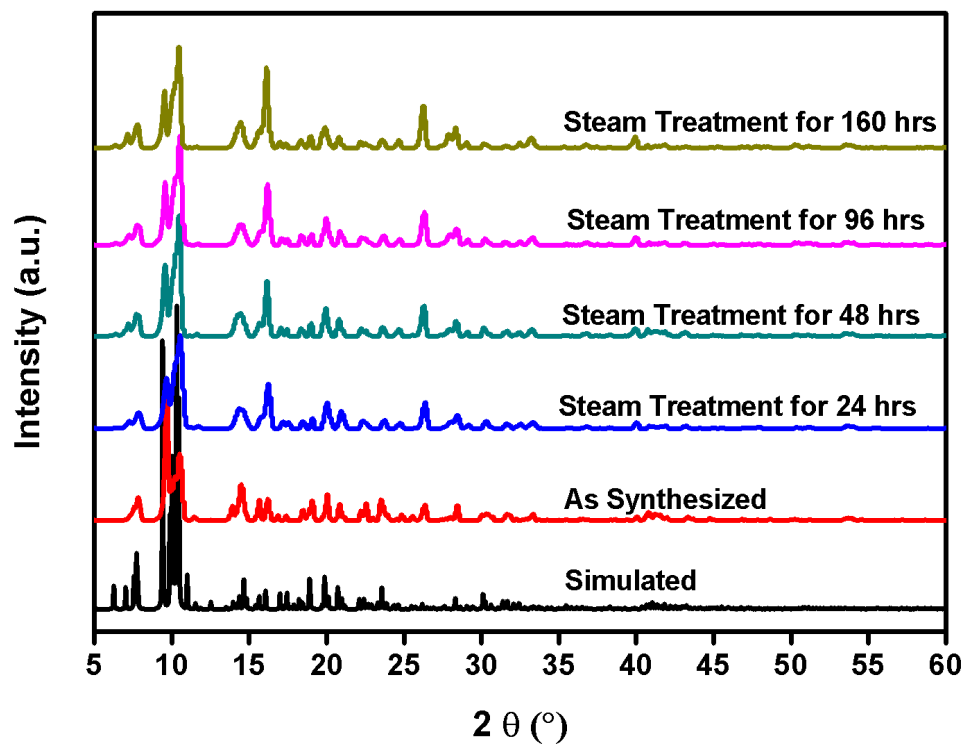

**Figure S23.** PXRD comparisons of the as-made sample with the simulated. Presented is also the PXRDs indicating the hydrolytic stability of **1**.

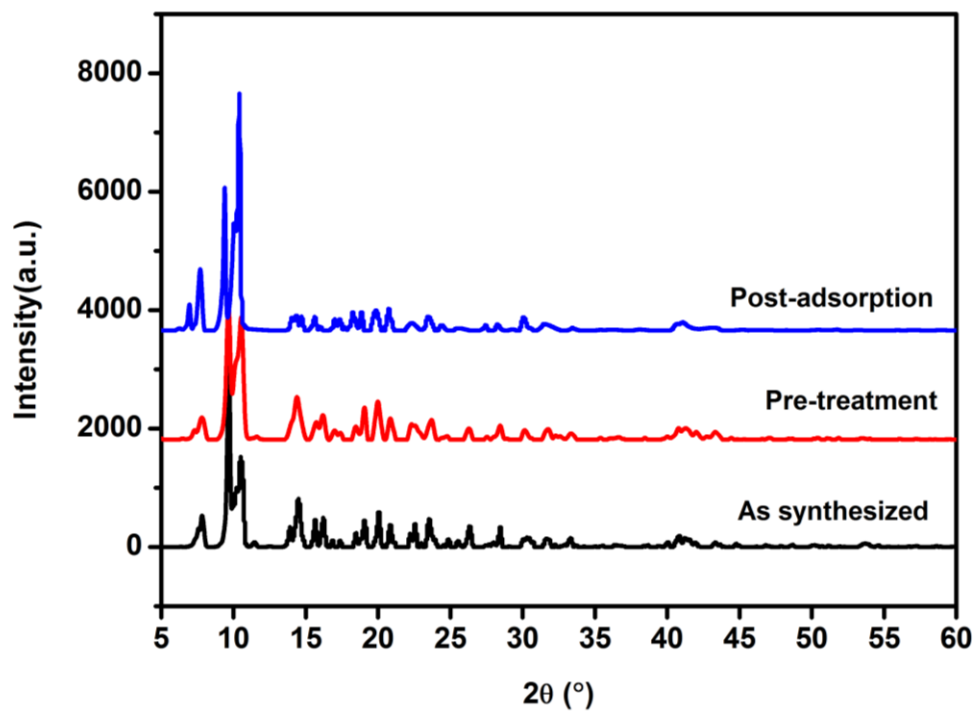

**Figure S24.** Comparison of PXRDs indicating the complete retention of crystallinity following repeated (~8-10 cycles) heating and cooling of **1** during multiple gas adsorption studies.

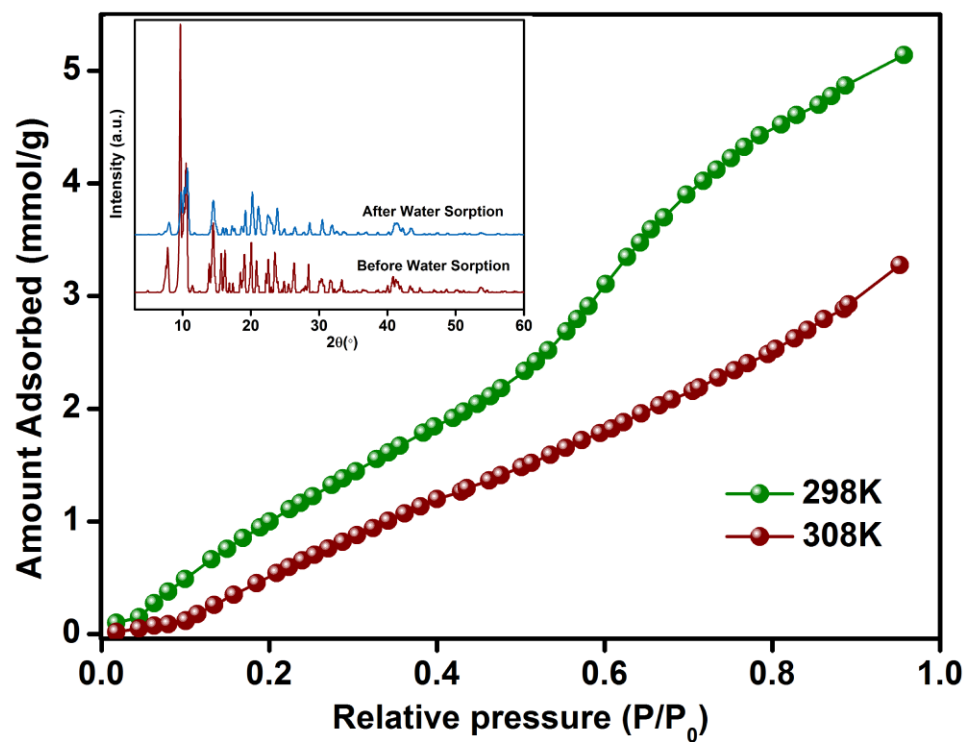

**Figure S25.** The water adsorption isotherm carried out on **1** at 298K. Inset showing the PXRD of the post adsorption phase. Both together represent the hydrolytic stability of **1**.

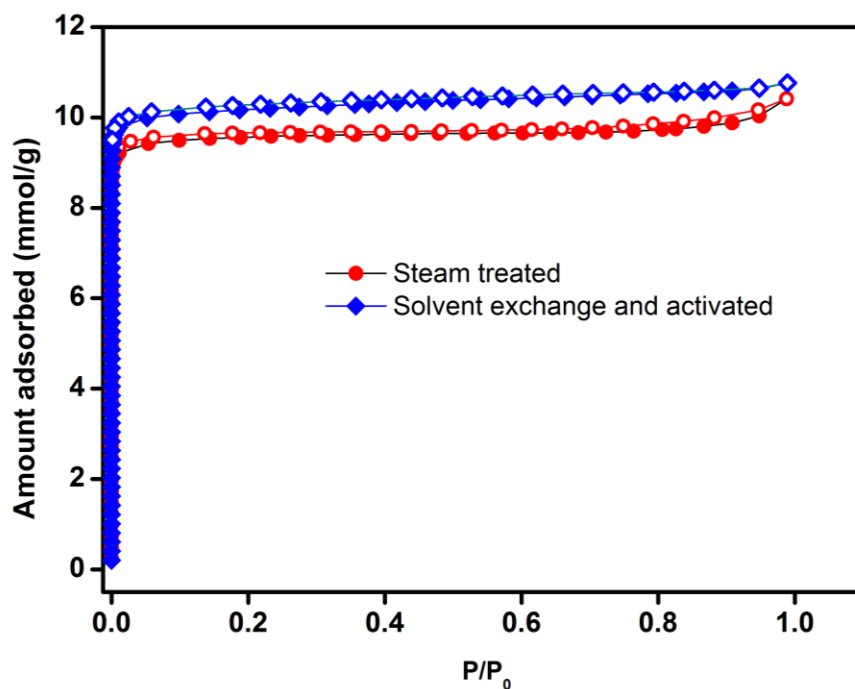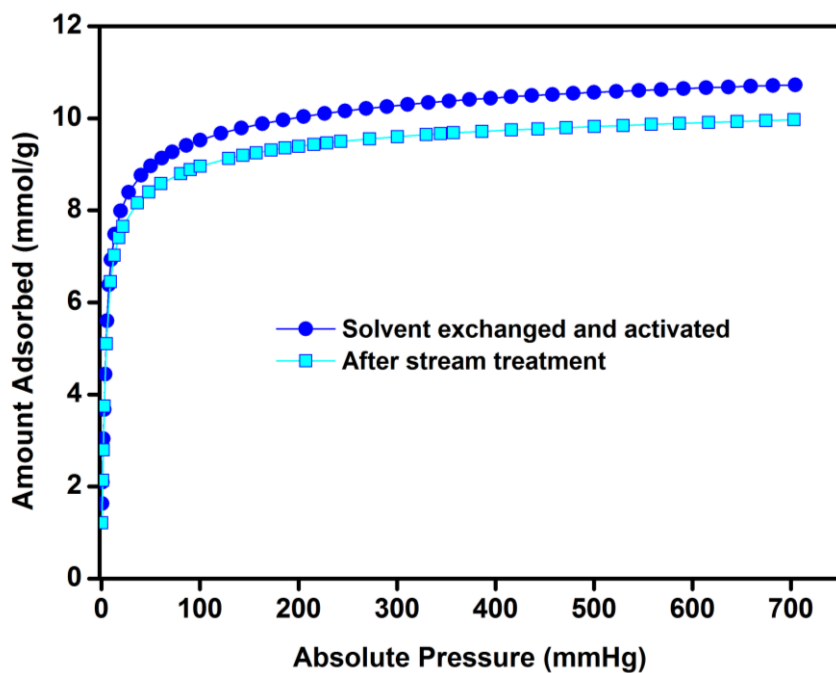

**Figure S26.** Hydrolytic stability of **1**. Top: Comparison of the N<sub>2</sub> adsorption at 77K for the freshly activated sample and the sample that was exposed to >95% steam for ~7days. Bottom: Comparison of the CO<sub>2</sub> adsorption at 195K for the freshly activated sample and the sample that was exposed to >95% steam for ~7days.

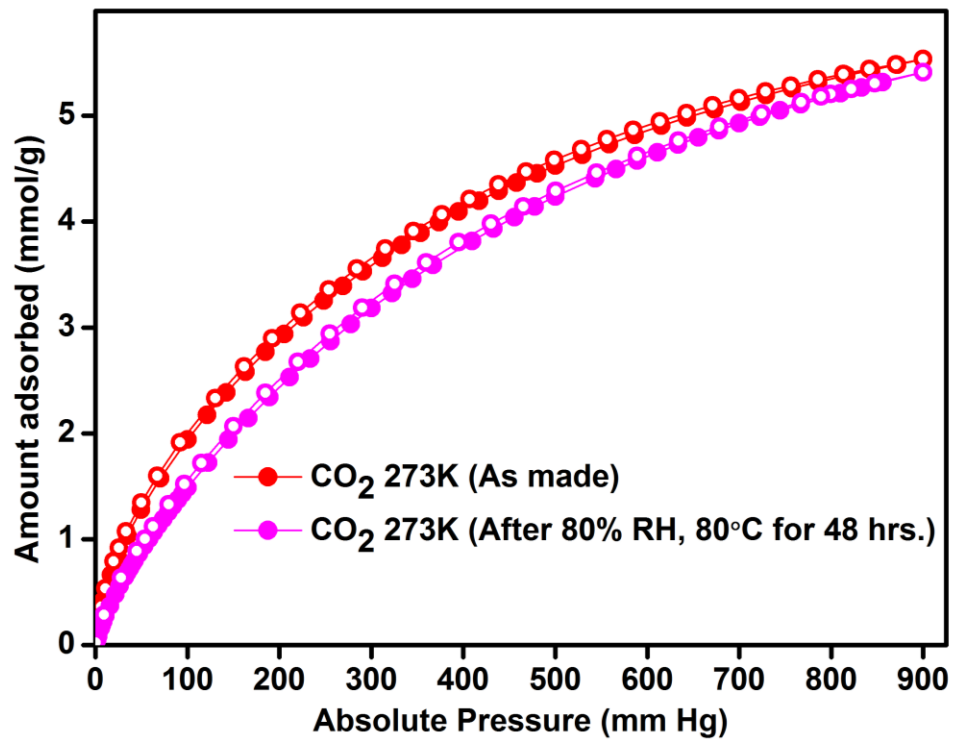

**Figure S27.** The comparison of the CO<sub>2</sub> adsorption isotherms of **1**, as made (red) vs sample exposed to 80%RH at 80°C for 48hrs (magenta).

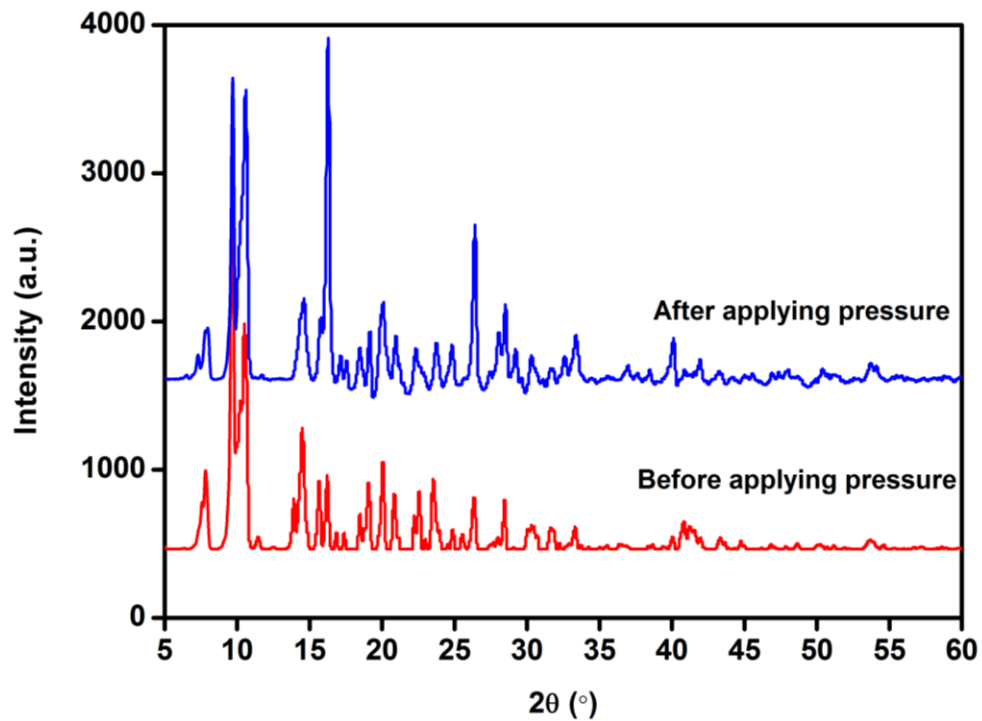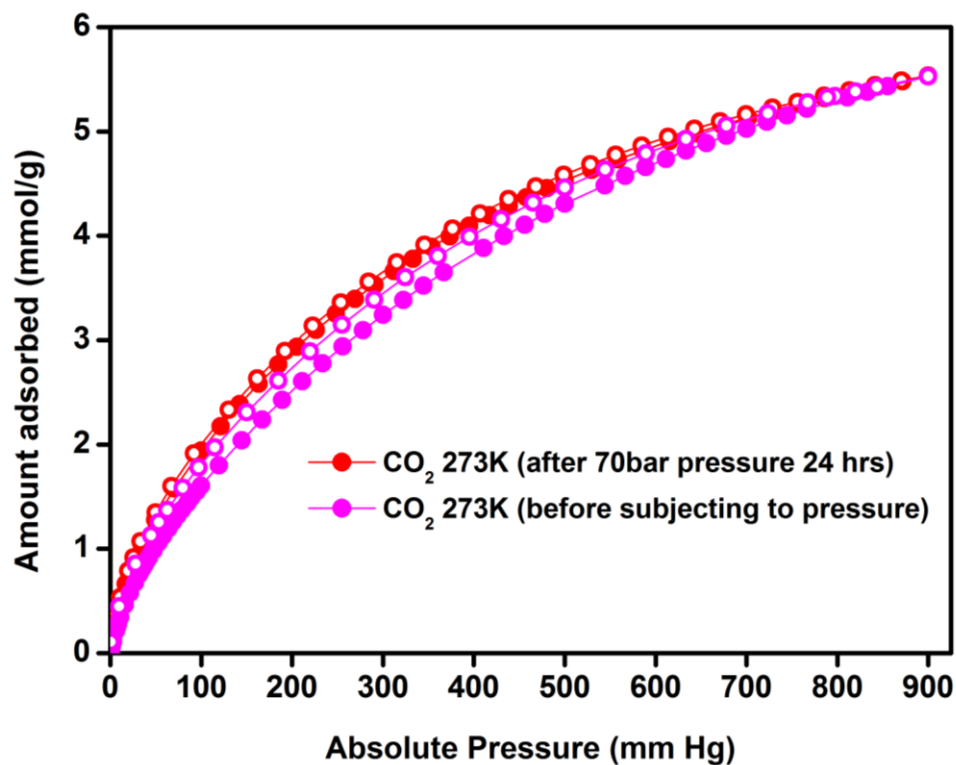

**Figure S28.** Pressure induced amorphization test for **1**. Note there is hardly any loss in crystallinity or gas uptake. Pressure of 70bar is twice what is industrially used.



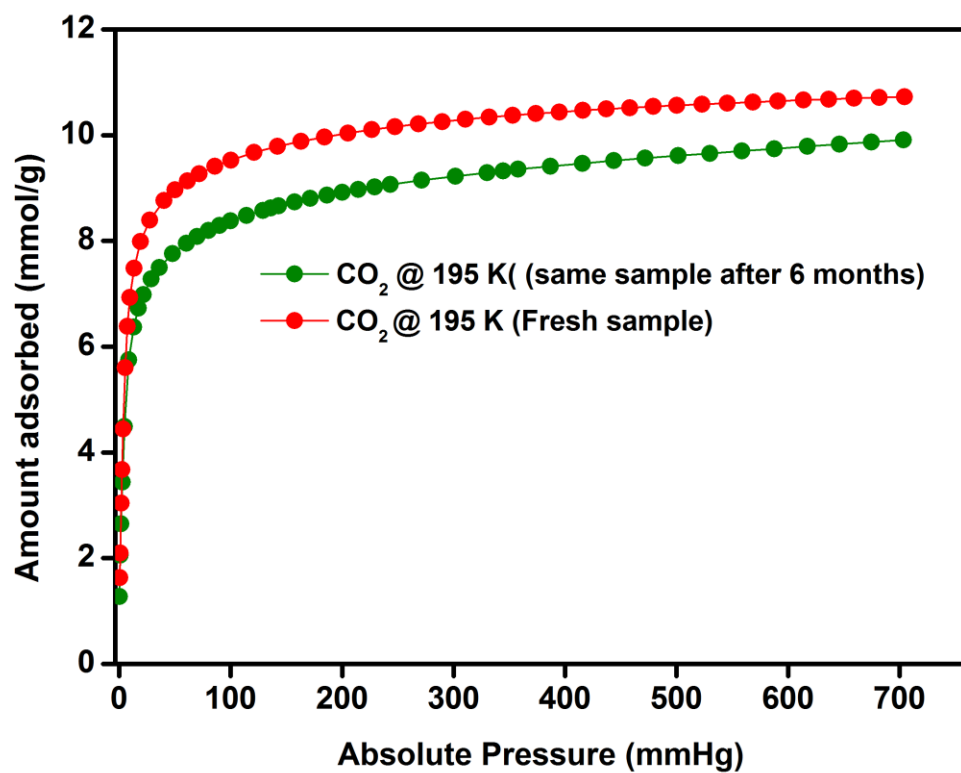

**Figure S29.** The comparison of the CO<sub>2</sub> adsorption in **1** between a freshly prepared phase and one that has been sitting in a bottle for over 6 months.

## 9. Adsorption-Desorption Cycling Experiments

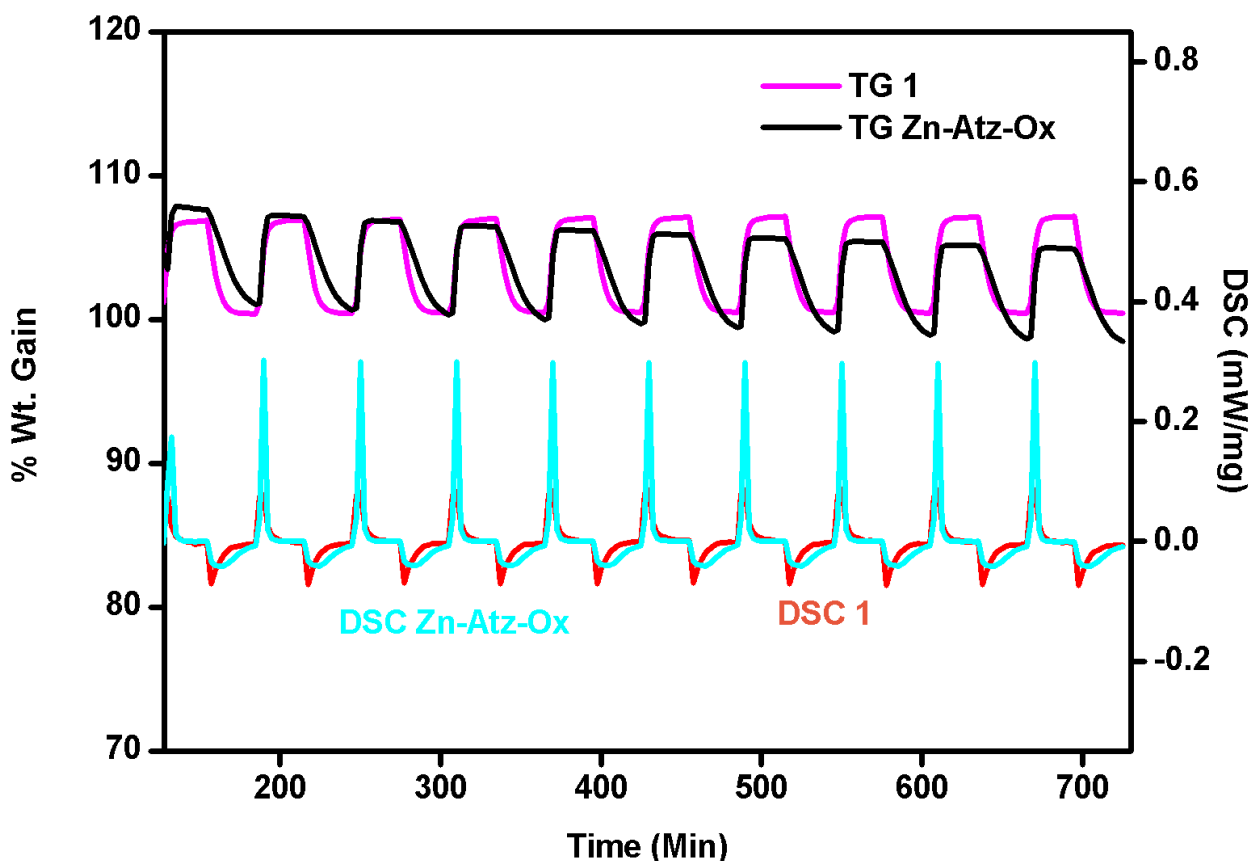

**Figure S30.** TGA cycling data for  $\text{CO}_2\text{-N}_2$  cycling done on **1** and ZnAtzOx at  $35^\circ\text{C}$ .  $\text{N}_2$  and  $\text{CO}_2$  were flowed at  $20\text{ml/min}$  and each cycle starts with a  $\text{CO}_2$  (30mins) followed by a  $\text{N}_2$  (30mins). Both **1** and ZnAtzOx show  $\sim 6.5\%$  Wt. gain. Comparison of the DSC trace indicates the higher heat of adsorption for the latter as would be expected (HOA:  $28\text{kJ/mol}$  for **1** vs.  $40\text{kJ/mol}$  for ZnAtzOx). Also, a closer look at the profiles of the TG shows the facile removal of the  $\text{CO}_2$  in **1**, as compared to ZnAtzOx as indicated by the sharper desorption for **1**. The drift in the TGA with time in the case of ZnAtzOx is entirely due to baseline issues, the weight gain remains unchanged between cycles.

### 10. Self-diffusion coefficient CO<sub>2</sub> in 1:

Diffusion coefficient determination from Rate of adsorption measurements: An extremely high resolution rate of adsorption measurement was carried out using the ASAP2020HD instrument at 273K in the pressure range of 0-1bar. The diffusion coefficient was calculated as a function of CO<sub>2</sub> loading. For this purpose, 8 different loading points (N= 1.09, 1.67, 2.17, 2.60, 2.99, 3.31, 3.63 and 3.93) were used and each of the ROA data was fitted to a spherical pore model (Kourosh et al. *J. Chem. Phys.*, 119, 2801 (2003); Adsorption analysis and equilibria and kinetics, D. D. Do, Imperial College Press, Ed. 2008):

$$F = 1 - \frac{6}{\pi^2} \sum_{n=1}^{\infty} \frac{1}{n^2} \text{Exp}(-n^2 \pi^2 \tau)$$

F = fractional uptake;  $\tau$  = non-dimensional time given by  $\tau = Dt/R^2$ , where R= particle size; t= time (secs); D = apparent diffusivity.

The single-component diffusion coefficient was estimated to be  $3.08 \times 10^{-9} \text{m}^2 \text{s}^{-1}$  taking the average of these eight points. Note: the kinetics of the low loadings (<1mmol/g) were extremely hard to model.

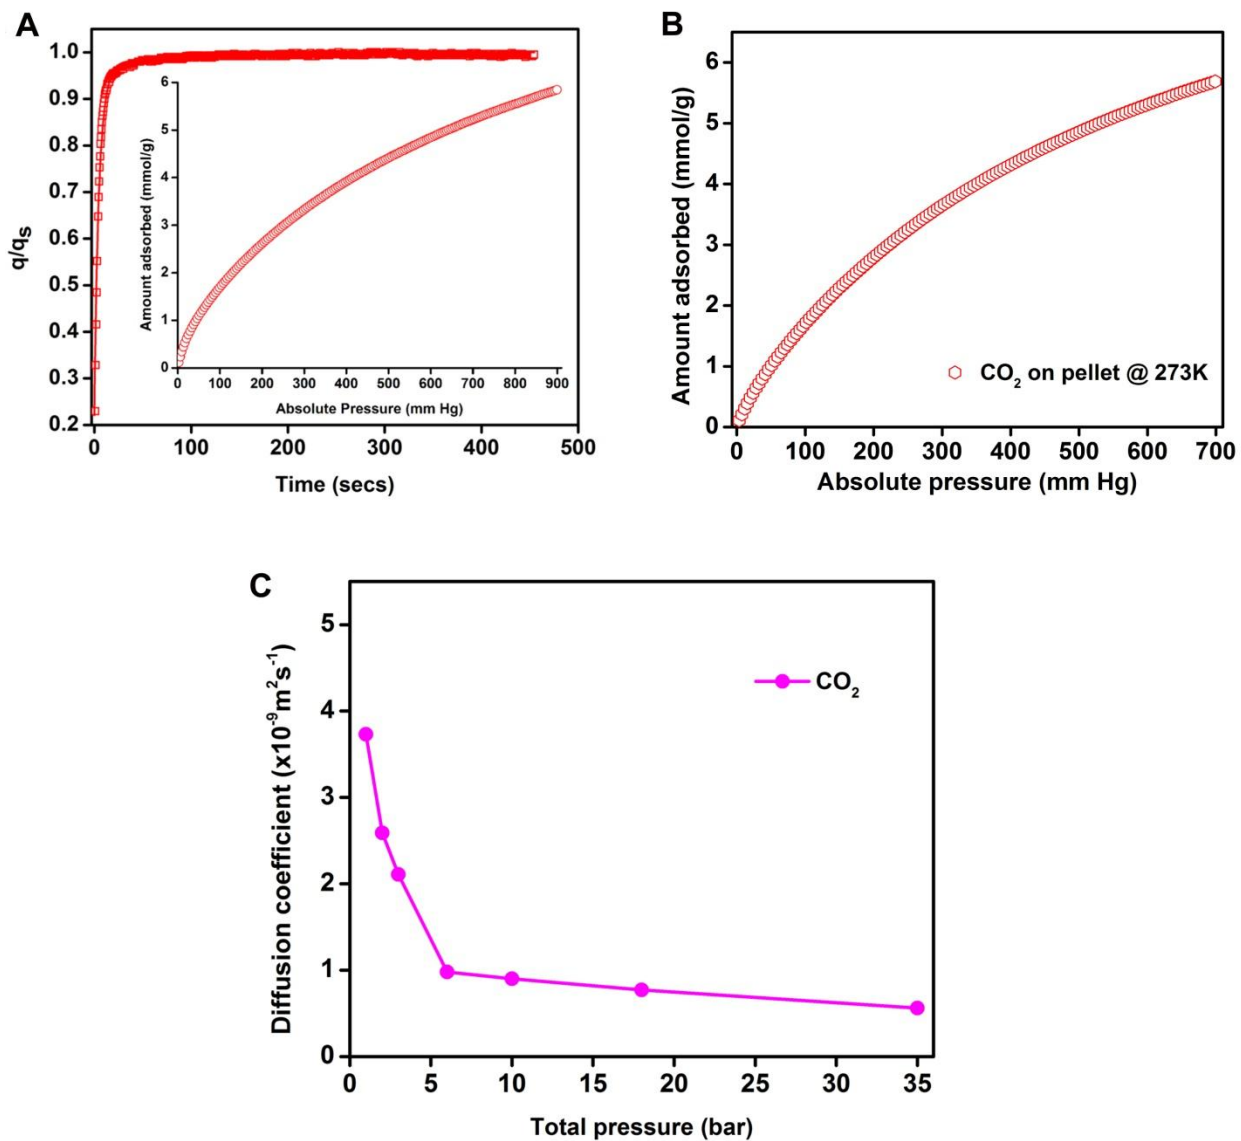

**Figure S31.** Top: Representative plot of the adsorbate fractional filling vs. time showing the fit between the spherical model (line) and the collected data (spheres) obtained from the single component CO<sub>2</sub> isotherm. Inset shows the high resolution 273K adsorption isotherm used in this diffusion modeling. Note nine such fittings were considered to obtain the average diffusion coefficient. Bottom: Self-diffusion coefficient for CO<sub>2</sub> obtained from simulation studies.

## 11. Computational and Molecular Modeling Details

The simulated uptake of Ni-4PyC was calculated using Grand Canonical Monte Carlo (GCMC) calculations. Both single component and binary mixtures of CO<sub>2</sub> and H<sub>2</sub> were performed. The initial experimental crystal structure of **1** had disorder with respect to the orientation and direction of the organic SBU. The SBU could either bind the metal centre via the nitrogen of the pyridine ring or the oxygen of the carboxylic acid, which resulted in the observed disorder. Of all possible combinations of the organic SBU orientations, only three had no serious steric overlap. These three structures had almost identical isotherms with the greatest difference in uptake being only 0.1 mmol/g through the pressure range from 0-1 bar. The structure with the least symmetry was used. Before GCMC calculations could be performed, the MOF framework structure was optimized using periodic density functional theory (DFT) (P. Hohenberg, *Phys. Rev.* 136, B864 (1964); W. Kohn, et al. *Phys. Rev.* 140, A1133 (1965)). Geometry optimizations were performed starting from high quality experimental X-ray structures with all atoms and unit cell parameters optimized. Periodic DFT calculations were performed with the VASP code (G. Kresse et al., *Phys. Rev. B* 47, 558 (1993); *Phys. Rev. B* 54, 11169 (1996)) using the PBE exchange-correlation functional (J. P. Perdew et al. *Phys. Rev. Lett.* 77, 3865 (1996)). PAW pseudopotentials (P. E. Blöchl, *Phys. Rev. B* 50, 17953 (1994); G. Kresse, *Phys. Rev. B* 59, 1758 (1999)) were used in a plane wave basis set with a kinetic energy cut-off of 520 eV. All calculations were spin polarized and only the  $\Gamma$ -point was sampled. Empirical dispersion corrections of Grimme (S. Grimme, *J. Comput. Chem.* 27, 1787 (2006)) were included in both energy and force calculations with the default scaling factor of 0.75, as parameterized by Grimme, for the PBE functional.

GCMC calculations were performed with the framework held fixed while the gas guest molecules were assumed to be rigid. The electrostatic energetic contributions were determined by partial atomic charges assigned to each atom calculated with the REPEAT method (C. Campaña et al. *J. Chem. Theory Comput.* 5, 2866 (2009)) using the DFT derived electrostatic potential. Dispersive and steric repulsive interactions were included by a 12-6 Lennard-Jones (L-J) potential for each atom. The  $\epsilon$  and  $\sigma$  parameters for the framework were taken from the Universal Force Field (UFF) (A. K. Rappe et al. *J. Am. Chem. Soc.* 114, 10024 (1992)). H<sub>2</sub> Lennard-Jones parameters, the H-H bond length (0.742 Å), and point charges for the five-site H<sub>2</sub>

model were taken from work by Belof *et. al* (*J. Chem. Theory Comput.* 4, 1332 (2008)) which is a hydrogen potential for condensed phase simulation. These parameters have been used in the simulation of H<sub>2</sub> in to study the adsorption of H<sub>2</sub> in ultra-microporous MOFs (K. A. Forrest, *J. Phys. Chem. C* 117, 17687 (2013)) and are shown below in table S8.

**Table S8.** Forcefield parameters for the 5-site H<sub>2</sub> model taken from by Belof *et. al* (2008). H2E corresponds to the true atomic positions of hydrogen atoms, H2G coincides with the center-of-mass site, and H2N contains the additional Lennard-Jones sites.

| Atom | R / Å  | Q / e   | $\epsilon$ / kcal mol <sup>-1</sup> | $\sigma$ / Å |
|------|--------|---------|-------------------------------------|--------------|
| H2E  | -0.371 | 0.3732  | 0.0000000                           | 0.0000       |
| H2N  | -0.329 | 0.0000  | 0.0080798                           | 2.3406       |
| H2G  | 0.000  | -0.7464 | 0.0175899                           | 3.2293       |
| H2N  | 0.329  | 0.0000  | 0.0080798                           | 2.3406       |
| H2E  | 0.371  | 0.3732  | 0.0000000                           | 0.0000       |

The  $\epsilon$  and  $\sigma$  parameters of CO<sub>2</sub> were taken from García-Sánchez *et al.* (*J. Phys. Chem. C* 113, 8814 (2009)) which were developed to fit experimental adsorption isotherm data in zeolite frameworks. The C-O bond length (1.149 Å) and partial charges on CO<sub>2</sub> atoms (C = +0.6512e, O = -0.3256e) were taken from the potential by Harris and Yung (*J. Phys. Chem.* 99, 12021 (1995)). Lennard-Jones parameters of all atom types are given in table S9.

**Table S9.** Lennard-Jones parameters for framework atoms from the UFF forcefield, CO<sub>2</sub> guest molecules.

| Forcefield                   | Atom                 | $\epsilon$ / kcal mol <sup>-1</sup> | $\sigma$ / Å |
|------------------------------|----------------------|-------------------------------------|--------------|
| UFF                          | C                    | 0.1050                              | 3.4309       |
| UFF                          | O                    | 0.0600                              | 3.1181       |
| UFF                          | N                    | 0.0690                              | 3.2607       |
| UFF                          | Ni                   | 0.0150                              | 2.5248       |
| García-Sánchez <i>et al.</i> | O (CO <sub>2</sub> ) | 0.1702                              | 3.0170       |
| García-Sánchez <i>et al.</i> | C (CO <sub>2</sub> ) | 0.0595                              | 2.7450       |

GCMC simulations were performed with an in-house code. The number of production steps used was 10<sup>7</sup> after an initial equilibration stage of 10<sup>6</sup> steps for each gas pressure point on

the isotherm. The Monte Carlo algorithm utilized equal probabilities for the moves of guest displacement, insertion, and deletion. A cut-off of 12.5 Å was used for long range interactions which were calculated using a Ewald summation. For pressures less than 1 bar, the ideal gas pressure was used in the Monte Carlo guest insertion and deletion criteria. Conversely, pressures greater than 1 bar was corrected for fugacity by evaluating the uptake based on pressures fitted to the Peng-Robinson Equation of State. (R. Stryjek et al. *Can. J. Chem. Eng.* 64, 323 (1986)). A 2x2x3 super-cell was used for the GCMC simulations. A similar approach has been used by us successfully to analyze CO<sub>2</sub> binding within an amine-functionalized MOF (Ref. 32 of main text).

From the probability distributions generated via the GCMC simulations the most probable CO<sub>2</sub> binding sites were calculated. The in-house code uses a Gaussian filter to smooth the GCMC probabilities. From here the maxima in the smoothed probability is determined. A single atom is fitted to this maxima and then the molecule is built such that the orientation fits maxima in the probability distributions of the other atom types in the molecule. The geometry was then optimized using the DL\_POLY package (T. R. Forrester et al. DL\_POLY ver. 2.18 (C.L.R.C. Daresbury Laboratory, Daresbury, UK, 1995)) with 200 MD steps at zero Kelvin. The ranking of binding sites were based on interaction energy and the occupancy of the binding sites with respect to the probability distributions. For determination of the binding energies, single point calculations were performed with interaction energies subdivided into dispersion and electrostatic contributions. The binding energy per CO<sub>2</sub> molecule is defined as,

$$E_{binding} = E(\text{MOF} + n\text{CO}_2) - E(\text{MOF}) - nE(\text{CO}_2) \quad (\text{S1})$$

where the configurational energies for the MOF with the guest CO<sub>2</sub> included in the simulations are used for  $E(\text{MOF} + n\text{CO}_2)$ .  $E(\text{MOF})$  is the configurational energy of the MOF with no guests.  $nE(\text{CO}_2)$  is the configurational energy of one CO<sub>2</sub> molecule times  $n$  number of CO<sub>2</sub> molecules. The cooperative energy was calculated as,

$$E_{cooperative} = E(\text{MOF} + n\text{CO}_2) - E(\text{MOF} + (n - 1)\text{CO}_2) \quad (\text{S2})$$

where the configurational energy of the MOF with  $n$  number of  $\text{CO}_2$  molecules in the unit cell is  $E(\text{MOF} + n\text{CO}_2)$ . The term  $E(\text{MOF} + (n - 1)\text{CO}_2)$  is the summation of the binding energies of  $n-1$  number of  $\text{CO}_2$  molecules in the unit cell as such,

$$\sum_{i=1}^{n-1} E(\text{MOF} + n\text{CO}_2) - E(\text{MOF}) - nE(\text{CO}_2) \quad (\text{S3})$$

A summary of cooperative binding energies of the 9 least ranked binding site  $\text{CO}_2$  molecules is shown in table S10.

**Table S10.** Cooperative  $\text{CO}_2$ - $\text{CO}_2$  energies with respect to the number of molecules loaded.

| $n$ $\text{CO}_2$<br>per unit<br>cell | Total<br>Cooperative<br>Energy (kJ/mol) | Cooperative<br>Energy Per<br>$\text{CO}_2$ (kJ/mol) |
|---------------------------------------|-----------------------------------------|-----------------------------------------------------|
| 22                                    | -108.7                                  | -4.9                                                |
| 23                                    | -118.5                                  | -5.1                                                |
| 24                                    | -120.0                                  | -5.0                                                |
| 25                                    | -121.2                                  | -4.8                                                |
| 26                                    | -123.8                                  | -4.8                                                |
| 27                                    | -136.3                                  | -5.0                                                |
| 28                                    | -146.6                                  | -5.2                                                |
| 29                                    | -152.9                                  | -5.3                                                |
| 30                                    | -145.3                                  | -4.8                                                |

Molecular dynamics simulations were performed with DL\_POLY in order to calculate the diffusion coefficients. The diffusion coefficients were determined from a single time origin from the calculated mean-square displacement (MSD) over time. The MSD is calculated as an average property of all  $N$   $\text{CO}_2$  molecules as,

$$\text{MSD}(t) = \frac{1}{N} \langle \sum_{i=1}^N |\mathbf{r}_i(t) - \mathbf{r}_i(0)|^2 \rangle = \langle |\mathbf{r}(t) - \mathbf{r}(0)|^2 \rangle \quad (\text{S5})$$

where  $r_i(0)$  corresponds to a starting position at time  $t = 0$  and  $r_i(t)$  corresponds to a position at time  $t$ . The diffusion coefficient,  $D$ , is defined as the slope of MSD with respect to time,



$$\lim_{t \rightarrow \infty} \frac{d\langle |r(t) - r(0)|^2 \rangle}{dt} = 6D \quad (\text{S6})$$

The MD simulation was done at 298.15 K and 1 bar with 0.2 ns of equilibration, 1 ns for the production run, and a time step of 0.001 ps with an NVT ensemble. This was done at flue gas conditions with a binary mixture of 15CO<sub>2</sub>:85N<sub>2</sub> in a 2x2x3 supercell with 69 CO<sub>2</sub> molecules which corresponds to a 2.10 mmol/g loading. A graph of the MSD with respect to time is shown in Figure S32.

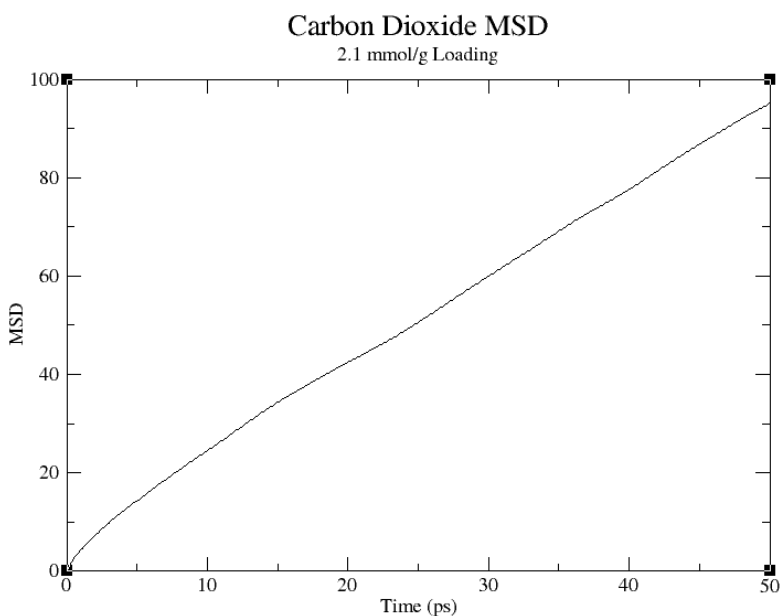

**Figure S32.** Plot of the Mean Square Displacement (MSD) as a function of time resulting from a molecular dynamics simulation of CO<sub>2</sub> in **1** at 298.15 K and 1 bar with a loading of 2.1 mmol/g.

The void volume (0.0434 cm<sup>3</sup>/g) and surface area (1193.16 m<sup>2</sup>/g) were calculated using the Zeo++ code (T. F. Willems et al. *Microporous Mesoporous Mater.* 149, 134 (2012); R. L. Martin, *J. Chem. Inf. Model.* 52, 308 (2012)) with a probe radii (1.72 Å) corresponding to CO<sub>2</sub> gas molecules. The accessible volume as measured by a solvent probe radius of 1.72 Å shows the presence the 1D channels which running through the unit cell. The center pore was found to be accessible via the channels at 1.00 Å which was also found to contain the strongest binding sites as mentioned in the main text. Depending on the orientation of the CO<sub>2</sub> molecule, it should be able to access this pocket via the channels. A graphical representation of the accessible volume is shown in figure S33.

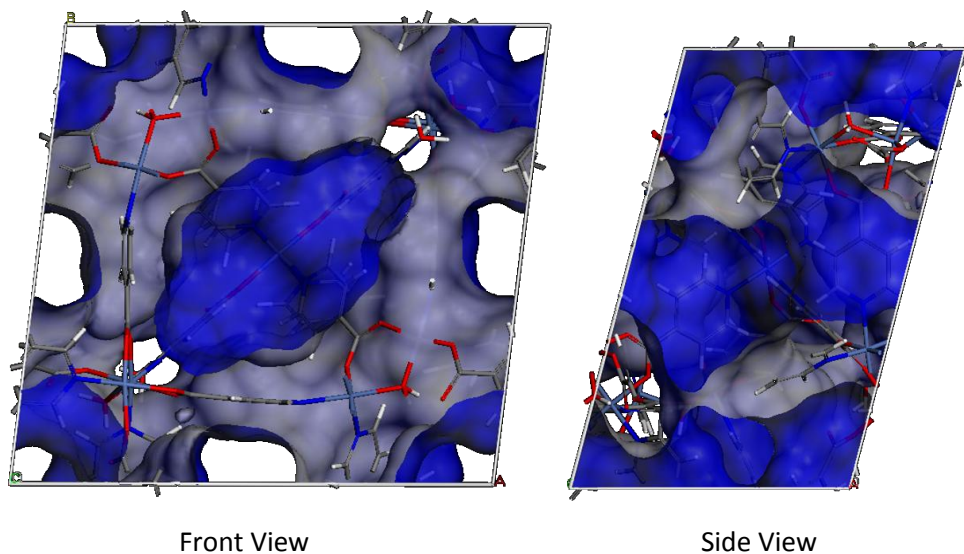

**Figure S33.** A graphical representation of the accessible volume of **1** with a probe radii of 1.41 Å.

In order to validate whether the CO<sub>2</sub> molecules are accessible to the middle cage, molecular dynamics simulations were performed with DL\_POLY. Two configurations were tested, one where the channels were saturated and the cage was empty and vice versa. This was done at 313 K and 10 bar to model high pressure adsorption with 0.2 ns of equilibration, 1 ns for the production run, and a time step of 0.001 ps with an NVT ensemble. In both simulations the CO<sub>2</sub> molecules diffuse into and out of the cages. It was found that cage to channel diffusion occurred throughout the simulation time length while channel to cage diffusion occurred almost instantaneously. Snapshots of the simulation are showed in Figure S34.

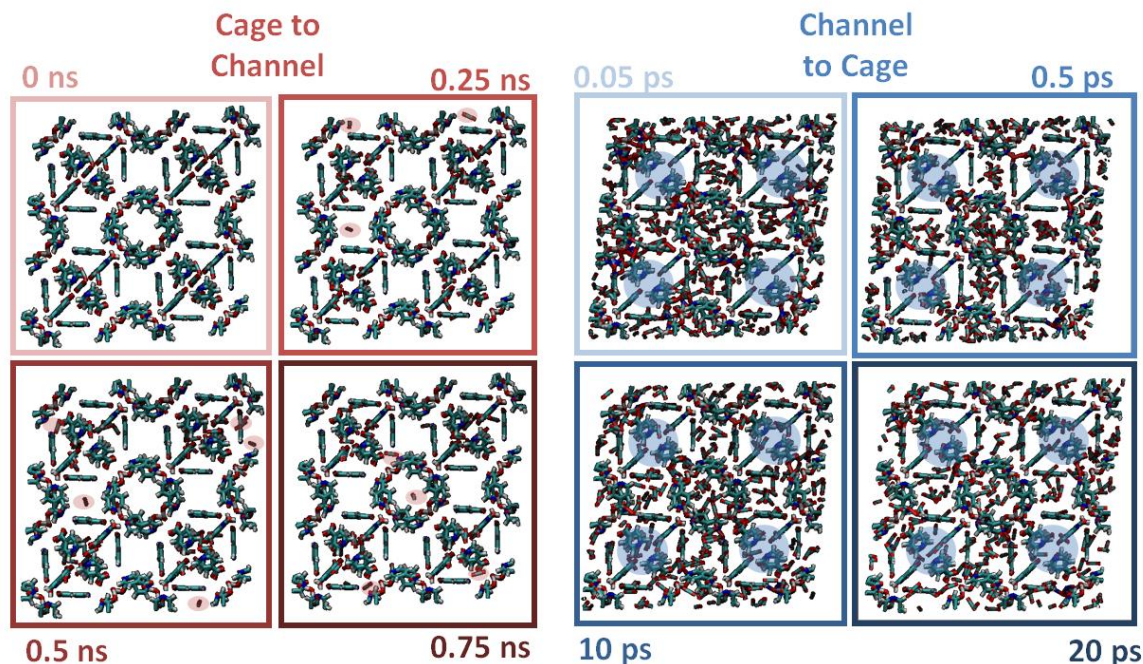

**Figure S34.** Snapshots from the MD simulation of CO<sub>2</sub> diffusing from the cage to the channel and vice versa. Highlighted in red are the CO<sub>2</sub> molecules which have diffused from the cage to the channel and highlighted in blue are the cages with CO<sub>2</sub> molecules inside. This was visualized using VMD (W. Humphrey, *J. Mol. Graph.* 14, 33 (1996)).

Simulation of 195 K CO<sub>2</sub> isotherm and 298 K high pressure (40 bar) does not show significant no differences in adsorption sites. Figure S35 compares the probability distributions of the CO<sub>2</sub> molecules resulting from GCMC simulations at the two conditions.

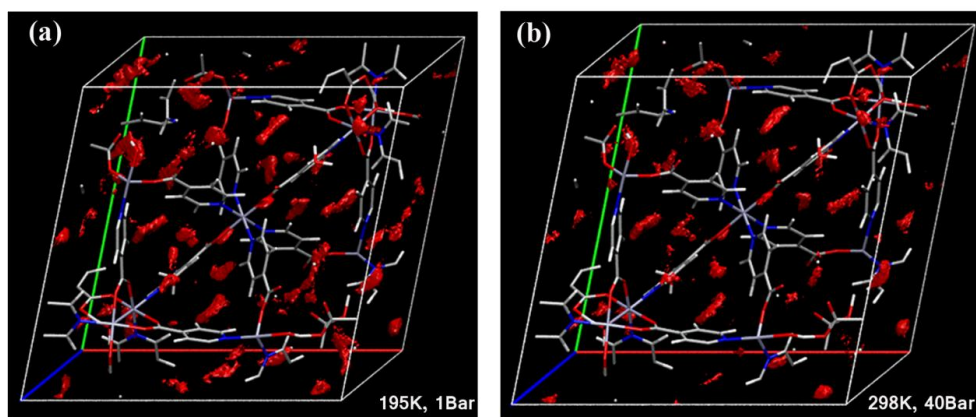

**Figure S35.** Probability densities of CO<sub>2</sub> center of mass as determined via GCMC calculations at a) 195 K and 1 bar and b) 298 K and 40 bar. The isosurface representation has an isovalue of 0.04 molecules/Å<sup>3</sup>. The densities are very similar between low temperature, low pressure, and high temperature, high pressure.

The selectivity of CO<sub>2</sub> over H<sub>2</sub> was calculated from a binary GCMC simulation where both guest molecules were present within the GCMC simulation at the same time. This was done by specifying the partial pressures of each gas molecule with a ratio of 40:60 and 20:80 (CO<sub>2</sub>:H<sub>2</sub>) which is an industrially relevant mixture comparable to that found in flue gas (Ref.23 of main text) and then evaluating the uptake with this mixture using the GCMC methods that were explained above. The selectivity was calculated using the following formula,

$$Selectivity_{1,2} = \frac{\frac{q_1}{P_1}}{\frac{q_2}{P_2}} \quad (S7)$$

where  $q_1$  is the calculated uptake of CO<sub>2</sub>,  $P_1$  is the partial pressure of CO<sub>2</sub> within the binary mixture,  $q_2$  is the uptake of H<sub>2</sub>, and  $P_2$  is the partial pressure of H<sub>2</sub> within the binary mixture.

Isosteric heat of adsorptions (HOA) were calculated from the GCMC simulations via the Green – Kubo fluctuation theory expression,

$$q_{isosteric} = \frac{\langle UN \rangle - \langle U \rangle \langle N \rangle}{\langle N^2 \rangle - \langle N \rangle \langle N \rangle} + RT \quad (S8)$$

where  $N$  is the number of CO<sub>2</sub> gas molecules in the GCMC simulation and  $U$  is the total configuration energy for the CO<sub>2</sub> molecules (T. Vuong et al. *Langmuir* 12, 5425 (1996)). The HOA is shown to match well with experiment as shown in a previous section of this supplementary info.

## 12. Comparison of CO<sub>2</sub>/H<sub>2</sub> selectivities of MOFs reported in the literature.

**Table S11:** H<sub>2</sub>/CO<sub>2</sub> Selectivities from Literature

| Material    | Temperature (k) | Pressure (bar) | Selectivity | Composition (H <sub>2</sub> /CO <sub>2</sub> ) | Source                                    |
|-------------|-----------------|----------------|-------------|------------------------------------------------|-------------------------------------------|
| Ni4PyC      | 313             | 10             | 229.29      | 60/40                                          | This Work                                 |
|             |                 | 1              | 168.15      | 60/40                                          |                                           |
|             |                 | 10             | 285.51      | 80/20                                          |                                           |
|             |                 | 1              | 194.51      | 80/20                                          |                                           |
| CarbonJX    | 313             | 10             | 75          | 60/40                                          |                                           |
|             |                 | 1              | 100         | 60/40                                          |                                           |
|             |                 | 10             | 94          | 80/20                                          |                                           |
|             |                 | 1              | 98          | 80/20                                          |                                           |
| Zeolite 13X | 313             | 10             | 250         | 60/40                                          |                                           |
|             |                 | 1              | 310         | 60/40                                          |                                           |
|             |                 | 10             | 320         | 80/20                                          |                                           |
|             |                 | 1              | 390         | 80/20                                          |                                           |
| Mg2(dobdc)  | 313             | 10             | 450         | 60/40                                          |                                           |
|             |                 | 1              | 620         | 60/40                                          |                                           |
|             |                 | 10             | 610         | 80/20                                          |                                           |
|             |                 | 1              | 880         | 80/20                                          |                                           |
| Cu-BTtri    | 313             | 10             | 28          | 60/40                                          | Long et al. <sup>a</sup>                  |
|             |                 | 1              | 30          | 60/40                                          |                                           |
|             |                 | 10             | 31          | 80/20                                          |                                           |
|             |                 | 1              | 40          | 80/20                                          |                                           |
| MOF-177     | 313             | 10             | 9           | 60/40                                          |                                           |
|             |                 | 1              | 9           | 60/40                                          |                                           |
|             |                 | 10             | 10          | 80/20                                          |                                           |
|             |                 | 1              | 10          | 80/20                                          |                                           |
| Co(BDP)     | 313             | 10             | 6           | 60/40                                          |                                           |
|             |                 | 1              | 5           | 60/40                                          |                                           |
|             |                 | 10             | 7           | 80/20                                          |                                           |
|             |                 | 1              | 6           | 80/20                                          |                                           |
| Bio-MOF-11  | 298             | 10             | 475         | 10/90                                          | Atci et al. <sup>b</sup><br>(simulated)   |
|             |                 | 1              | 400         | 10/90                                          |                                           |
| IRMOF-1     | 298             | 10             | ~10         | 10/90                                          | Keskin et al. <sup>c</sup><br>(simulated) |
|             |                 | 1              | ~10         | 10/90                                          |                                           |
| IRMOF-8     | 298             | 10             | ~10         | 10/90                                          |                                           |
|             |                 | 1              | ~10         | 10/90                                          |                                           |
| IRMOF-10    | 298             | 10             | ~10         | 10/90                                          |                                           |
|             |                 | 1              | ~10         | 10/90                                          |                                           |

|          |     |    |             |       |                                        |
|----------|-----|----|-------------|-------|----------------------------------------|
| IRMOF-14 | 298 | 10 | ~10         | 10/90 |                                        |
|          |     | 1  | ~10         | 10/90 |                                        |
| COF-102  | 298 | 10 | 25          | 10/90 |                                        |
|          |     | 1  | 20          | 10/90 |                                        |
| IRMOF-9  | 298 | 10 | 50          | 10/90 |                                        |
|          |     | 1  | 90          | 10/90 |                                        |
| COF-6    | 298 | 10 | 75          | 50/50 |                                        |
|          |     | 1  | 60          | 50/50 |                                        |
| COF-8    | 298 | 10 | <20         | 50/50 |                                        |
|          |     | 1  | <20         | 50/50 |                                        |
| COF-10   | 298 | 10 | <20         | 50/50 |                                        |
|          |     | 1  | <20         | 50/50 |                                        |
| COF-102  | 298 | 10 | <20         | 50/50 |                                        |
|          |     | 1  | <20         | 50/50 |                                        |
| COF-103  | 298 | 10 | <20         | 50/50 |                                        |
|          |     | 1  | <20         | 50/50 |                                        |
| COF-105  | 298 | 10 | <20         | 50/50 |                                        |
|          |     | 1  | <20         | 50/50 |                                        |
| Cu-BTC   | 298 | 10 | 70          | 50/50 | Liu et al. <sup>d</sup><br>(simulated) |
|          |     | 1  | 90          | 50/50 |                                        |
| IRMOF-1  | 298 | 10 | <20         | 50/50 |                                        |
|          |     | 1  | <20         | 50/50 |                                        |
| IRMOF-8  | 298 | 10 | <20         | 50/50 |                                        |
|          |     | 1  | <20         | 50/50 |                                        |
| IRMOF-10 | 298 | 10 | <20         | 50/50 |                                        |
|          |     | 1  | <20         | 50/50 |                                        |
| IRMOF-14 | 298 | 10 | <20         | 50/50 |                                        |
|          |     | 1  | <20         | 50/50 |                                        |
| IRMOF-16 | 298 | 10 | <20         | 50/50 |                                        |
|          |     | 1  | <20         | 50/50 |                                        |
| HKUST-1  | 298 | 1  | 4.52 - 6.84 | 50/50 | Guo et al. <sup>e</sup>                |

<sup>a</sup>Herm, Z. R.; Swisher, J. A.; Smit, B.; Krishna, R.; Long, J. R. *J. Am. Chem. Soc.* **2011**, *133* (15), 5664.

<sup>b</sup>Atci, E.; Erucar, I.; Keskin, S. *J. Phys. Chem. C* **2011**, *115* (14), 6833. <sup>c</sup>Keskin, S.; Sholl, D. S. *Langmuir* **2009**, *25* (19), 11786. <sup>d</sup>Liu, Y.; Liu, D.; Yang, Q.; Zhong, C.; Mi, J. *Ind. Eng. Chem. Res.* **2010**, *49* (6), 2902. <sup>e</sup>Guo, H.; Zhu, G.; Hewitt, I. J.; Qiu, S. *J. Am. Chem. Soc.* **2009**, *131* (5), 1646.
